# Supplementary material for: Evidence of Dynamically Dysregulated Gene Expression Pathways in Hyperresponsive B Cells from African American Lupus Patients
Source: PLoS One. 2013 Aug 15;8(8):e71397. doi: 10.1371/journal.pone.0071397 (PMC3744560; doi:10.1371/journal.pone.0071397)
Supplement: File S1 — Table S1, Cluster allocations and functional interconnection of 160 hyper-variably expressed genes in response to B cell stimulation. Data is a composite of the initial analysis group consisting of two control and two SLE patient cell lines. Table S2, Differentially expressed genes between normal and SLE-patient samples at early time points after B cell stimulation. Columns A and B describe information about the genes in the array. Columns C–H and I–M show normalized levels of gene expression (mean and standard deviation) for normal control and SLE-patient samples. Columns G and M depict the p-value obtained from an associative test, while columns H and N have the ratio of patient to control expression levels. The results of analysis are shown in columns O–R. In columns O–R, the minimum expression level set at >20 is used as the requirement for gene expression to be considered above background. In columns O and P, minimum differences in fold expression changes is set at >2. In columns Q and R the restriction for fold differences is decreased to 1.3. Expression Changes designations: A1 = significant overexpression in patient samples versus control samples; A2 = significant overexpression in control samples versus patient samples; A3 = gene expressed only in patient samples; A4 = gene expressed in only control samples. Columns S-AF show the results of the confirmatory analysis using the same samples as the initial analysis. Data from the initial two SLE patient and two 2 control cell lines are shown. (XLSX) [file pone.0071397.s001.xlsx]

## Sheet: Cluster allociations
Supplementary Table 1. Cluster Allocations and functional interconnection of 160 hyper-variably expressed genes in response to B cell stimulation.
Overall Gene Cluster Number	Cluster Number in Controls	Cluster Number in SLE Patients	Gene Names (Gene number)	Normal Control Group										SLE Patient Group							Common to Both Groups
1	1n	1p	CD69 (1)	23	0	0	0	0	0	0	0	0	0	0	0	0	0	0	0	0	2	9	14	22	124	135	0	0
1	1n	1p	EGR1 (2)	0	0	0	0	0	0	0	0	0	0	9	0	0	0	0	0	0	1	9	12	135	145	0	0	0
1	1n	1p	BACH1 (3)	17	20	0	0	0	0	0	0	0	0	0	0	0	0	0	0	0	4	10	0	0	0	0	0	0
1	1n	1p	CCNL1 (4)	19	21	0	0	0	0	0	0	0	0	6	15	31	0	0	0	0	3	0	0	0	0	0	0	0
1	1n	1p	CXCR4 (5)	128	0	0	0	0	0	0	0	0	0	8	11	0	0	0	0	0	0	0	0	0	0	0	0	0
1	1n	1p	DUSP1 (6)	9	0	0	0	0	0	0	0	0	0	4	15	30	0	0	0	0	16	0	0	0	0	0	0	0
1	1n	1p	EGR2 (7)	17	0	0	0	0	0	0	0	0	0	0	0	0	0	0	0	0	0	0	0	0	0	0	0	0
1	1n	1p	EGR3 (8)	15	0	0	0	0	0	0	0	0	0	5	10	11	13	19	30	34	12	0	0	0	0	0	0	0
1	1n	1p	FOS (9)	6	16	0	0	0	0	0	0	0	0	10	18	0	0	0	0	0	1	2	12	13	14	0	0	0
1	1n	1p	FOSB (10)	0	0	0	0	0	0	0	0	0	0	8	9	19	30	31	0	0	3	13	0	0	0	0	0	0
1	1n	1p	GPR65 (11)	15	16	0	0	0	0	0	0	0	0	5	8	34	0	0	0	0	13	0	0	0	0	0	0	0
1	1n	1p	IER2 (12)	0	0	0	0	0	0	0	0	0	0	30	122	0	0	0	0	0	2	8	9	0	0	0	0	0
1	1n	1p	NR4A2 (13)	17	20	0	0	0	0	0	0	0	0	8	15	17	0	0	0	0	9	10	11	16	19	0	0	0
1	1n	1p	PDE4B (14)	18	0	0	0	0	0	0	0	0	0	0	0	0	0	0	0	0	1	9	0	0	0	0	0	0
1	1n	1p	PTGS2 (15)	8	11	20	0	0	0	0	0	0	0	4	6	13	16	17	30	31	0	0	0	0	0	0	0	0
1	1n	1p	RGS2 (16)	9	11	19	0	0	0	0	0	0	0	15	0	0	0	0	0	0	6	13	0	0	0	0	0	0
1	1n	1p	SGK (17)	3	7	13	20	0	0	0	0	0	0	13	15	57	0	0	0	0	24	33	40	0	0	0	0	0
1	1n	1p	SNF1LK (18)	14	0	0	0	0	0	0	0	0	0	9	0	0	0	0	0	0	0	0	0	0	0	0	0	0
1	1n	1p	ZNF331 (19)	4	16	0	0	0	0	0	0	0	0	8	10	0	0	0	0	0	13	0	0	0	0	0	0	0
1	1n	1p	DUSP5 (20)	3	13	15	17	0	0	0	0	0	0	0	0	0	0	0	0	0	33	34	0	0	0	0	0	0
1	1n	1p	KLF6 (21)	4	0	0	0	0	0	0	0	0	0	0	0	0	0	0	0	0	33	0	0	0	0	0	0	0
1	1n	1p	RHOH (22)	-91	0	23	27	0	0	0	0	0	0	0	0	0	0	0	0	0	1	0	0	0	0	0	0	0
1	1n	1p	RLF (23)	1	22	124	0	0	0	0	0	0	0	0	0	0	0	0	0	0	0	0	0	0	0	0	0	0
1	1n	2p	TGIF (24)	0	0	0	0	0	0	0	0	0	0	0	0	0	0	0	0	0	17	0	0	0	0	0	0	0
1	1n	2p	NAB2 (25)	-112	0	0	0	0	0	0	0	0	0	35	55	0	0	0	0	0	39	0	0	0	0	0	0	0
1	1n	2p	GEM (26)	34	35	0	0	0	0	0	0	0	0	37	59	109	0	0	0	0	0	0	0	0	0	0	0	0
1	1n	6p	MXI1 (27)	22	124	136	0	0	0	0	0	0	0	53	0	0	0	0	0	0	156	157	0	0	0	0	0	0
1	1n	6p	PDK3 (28)	0	0	0	0	0	0	0	0	0	0	-118	0	0	0	0	0	0	0	0	0	0	0	0	0	0
1	1n	6p	ZBTB25 (29)	-111	0	124	144	154	0	0	0	0	0	0	0	0	0	0	0	0	140	142	0	0	0	0	0	0
1	2n	1p	LDLR (30)	0	0	0	0	0	0	0	0	0	0	6	8	10	12	15	31	0	0	0	0	0	0	0	0	0
1	2n	1p	TNF (31)	40	49	0	0	0	0	0	0	0	0	4	10	15	30	33	0	0	38	44	0	0	0	0	0	0
1	6n	1p	ZFP36 (32)	140	0	0	0	0	0	0	0	0	0	0	0	0	0	0	0	0	0	0	0	0	0	0	0	0
2	2n	1p	ATF3 (33)	40	49	0	0	0	0	0	0	0	0	31	0	0	0	0	0	0	17	20	21	34	0	0	0	0
2	2n	2p	IL10RA (34)	26	51	0	0	0	0	0	0	0	0	8	11	0	0	0	0	0	20	33	35	36	40	41	42	0
2	2n	2p	MAFF (35)	26	50	51	54	0	0	0	0	0	0	25	55	0	0	0	0	0	34	36	41	42	61	0	0	0
2	2n	2p	RAPGEF2 (36)	37	0	0	0	0	0	0	0	0	0	39	0	0	0	0	0	0	34	35	0	0	0	0	0	0
2	2n	2p	CD55 (37)	36	42	0	0	0	0	0	0	0	0	26	43	62	0	0	0	0	61	0	0	0	0	0	0	0
2	2n	2p	ID2 (38)	40	42	46	49	51	63	0	0	0	0	40	61	0	0	0	0	0	31	44	45	60	69	0	0	0
2	2n	2p	NAB1 (39)	0	0	0	0	0	0	0	0	0	0	36	56	0	0	0	0	0	25	45	0	0	0	0	0	0
2	2n	2p	PPP1R15A (40)	31	33	38	41	48	65	0	0	0	0	38	0	0	0	0	0	0	17	34	49	0	0	0	0	0
2	2n	2p	SCYA3 (41)	40	0	0	0	0	0	0	0	0	0	-53	0	68	0	0	0	0	34	35	47	0	0	0	0	0
2	2n	2p	ZFP36L2 (42)	37	38	51	0	0	0	0	0	0	0	43	0	0	0	0	0	0	34	35	61	0	0	0	0	0
2	2n	2p	EIF2AK3 (43)	0	0	0	0	0	0	0	0	0	0	37	42	62	0	0	0	0	0	0	0	0	0	0	0	0
2	2n	3p	HEXIM1 (44)	49	51	87	0	0	0	0	0	0	0	69	0	0	0	0	0	0	31	38	45	48	60	0	0	0
2	2n	3p	MNT (45)	45	51	0	0	0	0	0	0	0	0	56	0	0	0	0	0	0	38	39	44	46	48	69	71	0
2	2n	3p	SLC2A5 (46)	38	63	0	0	0	0	0	0	0	0	67	0	0	0	0	0	0	45	69	0	0	0	0	0	0
2	2n	3p	SLC21A12 (47)	45	0	0	0	0	0	0	0	0	0	48	49	66	68	69	71	0	41	0	0	0	0	0	0	0
2	2n	3p	CREM (48)	40	49	51	60	0	0	0	0	0	0	47	49	0	0	0	0	0	44	45	69	0	0	0	0	0
2	2n	3p	DUSP4 (49)	31	33	38	44	48	60	0	0	0	0	47	48	64	68	71	0	0	40	0	0	0	0	0	0	0
2	2n	4p	CSRP2 (50)	35	132	0	0	0	0	0	0	0	0	0	0	0	0	0	0	0	0	0	0	0	0	0	0	0
2	2n	6p	TXNIP (51)	34	35	38	42	44	45	48	0	0	0	131	0	0	0	0	0	0	0	0	0	0	0	0	0	0
2	2n	6p	RASSF1 (52)	0	0	0	0	0	0	0	0	0	0	0	0	0	0	0	0	0	0	0	0	0	0	0	0	0
2	2n	6p	CDC25C (53)	0	0	0	0	0	0	0	0	0	0	-41	0	27	156	0	0	0	0	0	0	0	0	0	0	0
2	2n	6p	PGF (54)	-115	0	35	0	0	0	0	0	0	0	0	0	0	0	0	0	0	132	0	0	0	0	0	0	0
2	6n	2p	BHLHB2 (55)	134	137	0	0	0	0	0	0	0	0	25	35	0	0	0	0	0	0	0	0	0	0	0	0	0
2	6n	2p	IL10 (56)	0	0	0	0	0	0	0	0	0	0	39	45	0	0	0	0	0	0	0	0	0	0	0	0	0
2	6n	2p	DUSP2 (57)	0	0	0	0	0	0	0	0	0	0	17	0	0	0	0	0	0	0	0	0	0	0	0	0	0
3	3n	1p	H2AFE (58)	0	0	0	0	0	0	0	0	0	0	73	0	0	0	0	0	0	63	0	0	0	0	0	0	0
3	3n	2p	PTGER4 (59)	78	0	0	0	0	0	0	0	0	0	26	60	109	0	0	0	0	69	0	0	0	0	0	0	0
3	3n	2p	CD83 (60)	48	49	61	63	78	0	0	0	0	0	59	0	0	0	0	0	0	38	44	75	0	0	0	0	0
3	3n	2p	JUND (61)	60	62	0	0	0	0	0	0	0	0	38	70	0	0	0	0	0	35	37	42	69	78	0	0	0
3	3n	2p	RND3 (62)	61	0	0	0	0	0	0	0	0	0	37	43	82	109	0	0	0	64	0	0	0	0	0	0	0
3	3n	2p	HIST1H2BF (63)	38	46	60	69	0	0	0	0	0	0	0	0	0	0	0	0	0	58	0	0	0	0	0	0	0
3	3n	2p	MYC (64)	87	0	0	0	0	0	0	0	0	0	49	0	0	0	0	0	0	62	69	0	0	0	0	0	0
3	3n	2p	LGMN (65)	40	67	0	0	0	0	0	0	0	0	-115	0	0	0	0	0	0	0	0	0	0	0	0	0	0
3	3n	3p	RELB (66)	86	0	0	0	0	0	0	0	0	0	47	0	0	0	0	0	0	69	73	78	98	105	0	0	0
3	3n	3p	SIAH2 (67)	65	75	77	0	0	0	0	0	0	0	46	71	72	0	0	0	0	0	0	0	0	0	0	0	0
3	3n	3p	CCL4 (68)	69	76	88	0	0	0	0	0	0	0	41	47	49	70	71	0	0	0	0	0	0	0	0	0	0
3	3n	3p	GLA (69)	38	63	68	82	0	0	0	0	0	0	38	44	47	0	0	0	0	45	46	48	59	61	64	66	78
3	3n	3p	IER3 (70)	71	80	0	0	0	0	0	0	0	0	61	68	0	0	0	0	0	0	0	0	0	0	0	0	0
3	3n	3p	KMO (71)	70	74	82	0	0	0	0	0	0	0	45	47	49	67	68	72	0	45	75	76	80	0	0	0	0
3	3n	3p	INSIG1 (72)	73	80	0	0	0	0	0	0	0	0	67	71	0	0	0	0	0	0	0	0	0	0	0	0	0
3	3n	3p	HMGCR (73)	72	77	0	0	0	0	0	0	0	0	58	66	0	0	0	0	0	66	92	0	0	0	0	0	0
3	3n	3p	EIF4ENIF1 (74)	71	83	0	0	0	0	0	0	0	0	104	0	0	0	0	0	0	79	0	0	0	0	0	0	0
3	3n	3p	NFKB1 (75)	67	77	0	0	0	0	0	0	0	0	0	0	0	0	0	0	0	60	71	76	78	86	0	0	0
3	3n	3p	STAT4 (76)	68	0	0	0	0	0	0	0	0	0	-137	0	78	91	0	0	0	71	75	80	0	0	0	0	0
3	3n	3p	TJP2 (77)	67	73	75	0	0	0	0	0	0	0	96	0	0	0	0	0	0	90	92	0	0	0	0	0	0
3	3n	3p	NFKBIA (78)	59	60	81	0	0	0	0	0	0	0	76	0	0	0	0	0	0	61	66	69	75	86	90	0	0
3	3n	4p	MYB (79)	-157	0	84	0	0	0	0	0	0	0	98	0	0	0	0	0	0	74	81	0	0	0	0	0	0
3	3n	4p	RAB38 (80)	70	72	0	0	0	0	0	0	0	0	0	0	0	0	0	0	0	71	76	0	0	0	0	0	0
3	3n	4p	DAPK1 (81)	78	86	92	98	0	0	0	0	0	0	-151	91	95	110	0	0	0	79	96	106	0	0	0	0	0
3	3n	4p	SQSTM1 (82)	69	71	0	0	0	0	0	0	0	0	62	99	0	0	0	0	0	85	89	96	0	0	0	0	0
3	3n	4p	TRAF4 (83)	74	0	0	0	0	0	0	0	0	0	0	0	0	0	0	0	0	0	0	0	0	0	0	0	0
3	3n	4p	KEAP1 (84)	-157	0	79	0	0	0	0	0	0	0	104	0	0	0	0	0	0	0	0	0	0	0	0	0	0
3	3n	4p	SLC3A2 (85)	0	0	0	0	0	0	0	0	0	0	-151	0	0	0	0	0	0	82	0	0	0	0	0	0	0
3	3n	4p	ICAM1 (86)	66	81	96	0	0	0	0	0	0	0	90	100	111	0	0	0	0	75	78	91	92	98	99	103	105
3	3n	5p	AICDA (87)	44	64	0	0	0	0	0	0	0	0	0	0	0	0	0	0	0	0	0	0	0	0	0	0	0
3	3n	5p	HMOX1 (88)	68	0	0	0	0	0	0	0	0	0	0	0	0	0	0	0	0	0	0	0	0	0	0	0	0
4	3n	4p	CCR7 (89)	-157	0	0	0	0	0	0	0	0	0	0	0	0	0	0	0	0	82	0	0	0	0	0	0	0
4	3n	4p	GPR137B (90)	0	0	0	0	0	0	0	0	0	0	86	0	0	0	0	0	0	77	78	92	0	0	0	0	0
4	4n	4p	PIP5K1B (91)	-142	-139	-22	0	0	0	0	0	0	0	76	81	0	0	0	0	0	86	99	0	0	0	0	0	0
4	4n	4p	MYO5A (92)	81	0	0	0	0	0	0	0	0	0	0	0	0	0	0	0	0	73	77	86	90	0	0	0	0
4	4n	4p	PMM2 (93)	-133	0	99	103	0	0	0	0	0	0	0	0	0	0	0	0	0	101	0	0	0	0	0	0	0
4	4n	4p	CD226 (94)	0	0	0	0	0	0	0	0	0	0	0	0	0	0	0	0	0	0	0	0	0	0	0	0	0
4	4n	4p	CEBPB (95)	99	101	102	0	0	0	0	0	0	0	81	103	0	0	0	0	0	0	0	0	0	0	0	0	0
4	4n	4p	CEBPG (96)	81	86	100	106	0	0	0	0	0	0	77	81	103	110	0	0	0	82	101	0	0	0	0	0	0
4	4n	4p	TXNRD1 (97)	0	0	0	0	0	0	0	0	0	0	-127	0	0	0	0	0	0	-151	0	111	0	0	0	0	0
4	4n	4p	MT1L (98)	81	102	0	0		0	0	0	0	0	79	111	0	0	0	0	0	66	86	99	100	103	105	0	0
4	4n	4p	NUP98 (99)	-133	0	93	95	98	101	0	0	0	0	82	0	0	0	0	0	0	86	91	98	100	106	109	0	0
4	4n	4p	TRAF1 (100)	-138	96	102	106	0	0	0	0	0	0	86	0	0	0	0	0	0	98	99	0	0	0	0	0	0
4	4n	4p	SLC7A5 (101)	-133	95	99	102	104	113	0	0	0	0	0	0	0	0	0	0	0	93	96	0	0	0	0	0	0
4	4n	4p	ASCL1 (102)	-138	0	95	98	100	101	0	0	0	0	-127	0	0	0	0	0	0	0	0	0	0	0	0	0	0
4	4n	4p	MT1H (103)	93	0	0	0	0	0	0	0	0	0	95	96	0	0	0	0	0	86	98	105	107	0	0	0	0
4	4n	4p	SCO2 (104)	101	0	0	0	0	0	0	0	0	0	74	84	0	0	0	0	0	0	0	0	0	0	0	0	0
4	4n	4p	MT1X (105)	0	0	0	0	0	0	0	0	0	0	0	0	0	0	0	0	0	66	86	98	103	107	0	0	0
4	4n	4p	NFKB2 (106)	96	100	0	0	0	0	0	0	0	0	-142	0	0	0	0	0	0	81	99	0	0	0	0	0	0
4	4n	4p	MT2A (107)	0	0	0	0	0	0	0	0	0	0	0	0	0	0	0	0	0	103	105	108	0	0	0	0	0
4	4n	5p	OXTR (108)	0	0	0	0	0	0	0	0	0	0	-132	0	114	0	0	0	0	107	0	0	0	0	0	0	0
5	5n	2p	ATP2B1 (109)	0	0	0	0	0	0	0	0	0	0	26	59	62	0	0	0	0	99	0	0	0	0	0	0	0
5	5n	4p	MGAT2 (110)	-154	-147	0	0	0	0	0	0	0	0	81	96	0	0	0	0	0	0	0	0	0	0	0	0	0
5	5n	4p	MAT2A (111)	-154	-148	-142	-128	-127	-29	0	118	0	0	-135	86	98	0	0	0	0	-130	0	97	0	0	0	0	0
5	5n	5p	CHUK (112)	-25	115	0	0	0	0	0	0	0	0	-147	0	0	0	0	0	0	-128	0	0	0	0	0	0	0
5	5n	5p	PSAT1 (113)	101	0	0	0	0	0	0	0	0	0	0	0	0	0	0	0	0	-145	116	117	0	0	0	0	0
5	5n	5p	RAB7L1 (114)	0	0	0	0	0	0	0	0	0	0	-131	0	108	0	0	0	0	-152	-143	-133	0	116	0	0	0
5	5n	5p	SFRS1 (115)	-54	0	112	0	0	0	0	0	0	0	-65	0	0	0	0	0	0	121	0	0	0	0	0	0	0
5	5n	5p	WARS (116)	-150	0	119	0	0	0	0	0	0	0	-141	0	0	0	0	0	0	113	114	0	0	0	0	0	0
5	5n	5p	XPOT (117)	-130	-122	0	0	0	0	0	0	0	0	-141	-139	0	0	0	0	0	-145	0	113	0	0	0	0	0
5	5n	5p	ZMPSTE24 (118)	-149	-148	-147	-130	-128	0	111	0	0	0	-141	-129	-28	0	0	0	0	-154	-140	-129	0	0	0	0	0
5	5n	5p	DNAJA1 (119)	-150	-147	-145	-125	116	0	0		0	0	-152	0	0	0	0	0	0	-132	0	0	0	0	0	0	0
5	5n	5p	TP53 (120)	121	0	0	0	0	0	0	0	0	0	0	0	0	0	0	0	0	0	0	0	0	0	0	0	0
5	5n	5p	HSPH1 (121)	120	0	0	0	0	0	0	0	0	0	-144	0	0	0	0	0	0	115	0	0	0	0	0	0	0
6	6n	1p	PDK1 (122)	-117	0	123	130	134	135	0	0	0	0	12	141	0	0	0	0	0	0	0	0	0	0	0	0	0
6	6n	1p	PTPRK (123)	122	138	0	0	0	0	0	0	0	0	0	0	0	0	0	0	0	0	0	0	0	0	0	0	0
6	6n	1p	SLC2A3 (124)	23	27	29	0	0	0	0	0	0	0	127	134	0	0	0	0	0	1	0	0	0	0	0	0	0
6	6n	1p	BAX (125)	-119	0	145	150	0	0	0	0	0	0	0	0	0	0	0	0	0	0	0	0	0	0	0	0	0
6	6n	2p	VEGF (126)	156	0	0	0	0	0	0	0	0	0	0	0	0	0	0	0	0	149	0	0	0	0	0	0	0
6	6n	6p	BNIP3 (127)	-111	0	134	154	0	0	0	0	0	0	-102	-97	0	124	134	0	0	140	144	145	0	0	0	0	0
6	6n	6p	GSTK1 (128)	-118	-111	0	5	129	130	141	160	0	0	139	153	0	0	0	0	0	-112	0	148	155	0	0	0	0
6	6n	6p	BNIP3L (129)	128	0	0	0	0	0	0	0	0	0	0	0	0	0	0	0	0	-118	0	132	141	149	155	0	0
6	6n	6p	ITGB3BP (130)	-118	-117	0	122	128	0	0	0	0	0	0	0	0	0	0	0	0	-111	0	0	0	0	0	0	0
6	6n	6p	POLA (131)	145	154	0	0	0	0	0	0	0	0	-114	0	51	0	0	0	0	132	0	0	0	0	0	0	0
6	6n	6p	FDXR (132)	50	0	0	0	0	0	0	0	0	0	-108	0	0	0	0	0	0	-119	0	54	129	131	150	0	0
6	6n	6p	CAT (133)	-101	-99	-93	0	0	0	0	0	0	0	139	154	0	0	0	0	0	-114	0	145	0	0	0	0	0
6	6n	6p	P4HA1 (134)	55	122	135	0	0	0	0	0	0	0	124	0	0	0	0	0	0	127	140	0	0	0	0	0	0
6	6n	6p	P4HA2 (135)	122	134	0	0	0	0	0	0	0	0	-111	0	0	0	0	0	0	1	2	145	0	0	0	0	0
6	6n	6p	CLK3 (136)	27	139	142	151	153	0	0	0	0	0	0	0	0	0	0	0	0	139	140	146	156	0	0	0	0
6	6n	6p	HMGCL (137)	55	0	0	0	0	0	0	0	0	0	-76	0	0	0	0	0	0	0	0	0	0	0	0	0	0
6	6n	6p	SIPA1 (138)	-102	-100	0	123	144	0	0	0	0	0	0	0	0	0	0	0	0	139	0	0	0	0	0	0	0
6	6n	6p	SIT1 (139)	-91	0	0	142	151	0	0	0	0	0	-117	0	128	133	145	153	0	136	138	140	0	0	0	0	0
6	6n	6p	SLC16A3 (140)	32	0	0	0	0	0	0	0	0	0			145	0	0	0	0	-118	0	29	127	134	136	139	0
6	6n	6p	AP3S1 (141)	128	0	0	0	0	0	0	0	0	0	-118	-117	-116	0	122	0	0	129	155	159	0	0	0	0	0
6	6n	6p	EGLN1 (142)	-111	-91	0	0	136	139	148	0	0	0	-106	0	0	0	0	0	0	29	146	149	154	0	0	0	0
6	6n	6p	GCHFR (143)	0	0	0	0	0	0	0	0	0	0	0	0	0	0	0	0	0	-114	0	152	0	0	0	0	0
6	6n	6p	GYS1 (144)	29	138	0	0	0	0	0	0	0	0	-121	0	147	0	0	0	0	127	0	0	0	0	0	0	0
6	6n	6p	HLA-DOB (145)	-119	0	125	127	131	154	0	0	0	0	127	139	140	0	0	0	0	-117	-113	0	2	133	135	0	0
6	6n	6p	HRSP12 (146)	0	0	0	0	0	0	0	0	0	0	153	0	0	0	0	0	0	136	142	154	156	0	0	0	0
6	6n	6p	ITGB2 (147)	-119	-118	-110	0	0	0	0	0	0	0	-112	0	144	152	0	0	0	149	154	0	0	0	0	0	0
6	6n	6p	NME4 (148)	-118	-111	0	142	154	160	0	0	0	0	0	0	0	0	0	0	0	128	0	0	0	0	0	0	0
6	6n	6p	PAM (149)	-118	0	0	0	0	0	0	0	0	0	155	0	0	0	0	0	0	126	129	142	147	154	0	0	0
6	6n	6p	TCIRG1 (150)	-119	-116	0	125	0	0	0	0	0	0	154	160	0	0	0	0	0	132	0	0	0	0	0	0	0
6	6n	6p	ADD3 (151)	136	139	152	153	154	0	0	0	0	0	-85	-81	0	0	0	0	0	-97	0	0	0	0	0	0	0
6	6n	6p	PYCARD (152)	151	153	0	0	0	0	0	0	0	0	147	160	0	0	0	0	0	-114	-119	0	143	0	0	0	0
6	6n	6p	PFKP (153)	136	151	152	0	0	0	0	0	0	0	128	139	146	0	0	0	0	154	0	0	0	0	0	0	0
6	6n	6p	PGM1 (154)	-111	-110	29	127	131	145	148	151	0	0	133	150	0	0	0	0	0	-118	0	142	146	147	149	153	0
6	6n	6p	ALDOC (155)	0	0	0	0	0	0	0	0	0	0	149	0	0	0	0	0	0	128	129	141	0	0	0	0	0
6	6n	6p	HIG2 (156)	126	136	158	0	0	0	0	0	0	0	53	0	0	0	0	0	0	136	146	0	0	0	0	0	0
6	6n	6p	P2Y5 (157)	-89	-84	-79	0	0	0	0	0	0	0	0	0	0	0	0	0	0	27	0	0	0	0	0	0	0
6	6n	6p	ADM (158)	156	0	0	0	0	0	0	0	0	0	0	0	0	0	0	0	0	0	0	0	0	0	0	0	0
6	6n	6p	ING2 (159)	0	0	0	0	0	0	0	0	0	0	0	0	0	0	0	0	0	141	0	0	0	0	0	0	0
6	6n	6p	TACI (160)	128	148	0	0	0	0	0	0	0	0	150	152	0	0	0	0	0	0	0	0	0	0	0	0	0
Overall clustering number is determined by hyper-variable genes.
Numbers located in the control, patient, and both groups columns indicate association with the correspondingly numbered gene.
Blue gene names= higher amplitude of variation in normal control group samples
Red gene names= higher amplitude of variatoin in SLE patient group samples
Bold gene names= uniquely variable

## Sheet: Early differential genes
Supplementary Table 2. Differentially expressed genes between normal and SLE-patients samples at the early time points after B cell stimulation.
Microarray Gene Information		unstimulated normalized levels of gene expression						stimulated normalized levels of gene expression						Expression Changes (>20, >2)		Expression Changes (>20, >1.3)		Confirmation of reproducibility: Unstimulated							Confirmation of reproducibility: Stimulated
		Control		Patient				Control		Patient				Unstimulated	Stimulated	Unstimulated	Stimulated		Control		Patient					Control		Patient
NCBI Locus	Gene	Average	SD	Average	SD	p value	Average Patient/Average Control	Average	SD	Average	SD	p value	Average Patient/Average Control	Control/ Patient	Control/ Patient	Control/ Patient	Control/ Patient	Expression Changes	Average	SD	Average	SD	p value	Average Patient/Average Control	Expression Changes	Average	SD	Average	SD	p value	Average Patient/Average Control
NM_005256.1	GAS2	96.2733	80.1809	36.8677	21.0436	0.00543735	0.382948	121.195	45.5705	43.5366	44.8937	0	0.359228		A2	A2	A2	A2	92.9716	70.7105	35.244	24.5423	6.0249e-10	0.379083	A2	116.37	43.2335	44.7747	41.7047	0	0.384763
NM_000078.1	CETP	103.296	53.8158	32.6212	51.8759	0	0.315803	97.7767	25.6086	44.3791	36.8646	0	0.453882		A2	A2	A2	A2	79.183	46.1419	28.973	44.3607	0	0.365899	A2	93.9689	26.5187	45.0629	33.4827	0	0.479551
NM_004820.2	CYP7B1	34.5866	36.0125	1.51524	3.56712	0	0.0438099	36.2424	28.3746	15.1857	13.9807	0	0.419003		A2	A2	A2	A4	24.6626	25.1424	2.01751	4.29233	3.37606e-13	0.0818043	A2	34.1695	27.1576	15.4469	13.8724	0	0.452065
NM_016548.1	GP73	99.1537	49.1128	43.9396	19.8661	0.000251288	0.443146	62.6596	25.8955	29.9131	19.3773	5.44087e-11	0.477391		A2	A2	A2	A2	97.9601	51.743	47.6423	21.5854	0	0.486344		60.655	26.0105	31.5529	21.6739	3.59712e-14	0.520204
NM_004403.1	DFNA5	1493.92	260.279	697.033	585.928	0	0.466579	1904.02	720.748	1404.4	649.064	0.000692731	0.737598	A2			A2	A2	1397.25	316.017	630.929	500.781	0	0.451551		1848.62	700.829	1364.62	626.628	9.53725e-07	0.738182
NM_005767.1	P2Y5	141.987	50.7769	29.4513	32.816	0	0.207423	181.556	163.751	113.991	101.968	0.0699291	0.627858	A2			A2	A2	84.1005	42.9838	22.4584	18.5262	0	0.267043		147.813	137.33	99.3431	85.7867	0.021419	0.672085
NM_013378.1	VPREB3	34.3025	23.361	9.37637	8.42334	4.1605e-05	0.273343	26.9888	21.0525	16.457	13.767	0.00593256	0.60977	A2			A2	A2	23.1107	20.3988	7.10039	6.10707	1.60149e-13	0.307234		25.3298	21.9906	16.9221	13.6498	0.0228736	0.668069
NM_000110.2	DPYD	34.7523	18.4296	11.9139	15.7976	0	0.342823	52.8251	32.3483	27.6186	18.0556	0.127766	0.522831			A2	A2	A2	33.4181	15.069	13.8925	14.9233	0	0.415717		50.8032	29.648	27.3893	17.9699	0.000899698	0.539125
NM_003749.1	IRS2	42.0686	39.05	14.1431	15.8286	8.73446e-10	0.33619	70.7117	103.125	17.2581	15.3422	0.576025	0.244062			A2	A2	A2	107.538	120.952	27.8741	30.3896	3.33245e-12	0.259203		89.589	128.086	33.1439	42.1716	0.377022	0.369955
NM_003271.1	TSPAN4	34.5616	6.80255	11.1788	14.0442	0	0.323445	26.3596	18.5104	13.155	11.2176	0.0871377	0.499059			A2	A2	A2	27.4274	12.2622	11.0357	14.0684	0	0.402359		20.5708	16.728	13.8795	10.0283	0.61414	0.674718
Cluster Incl. U63824	TEAD4	55.388	11.1068	25.8449	23.9754	0	0.466615	29.983	13.8096	20.1742	18.0067	4.17413e-05	0.672854			A2	A2	A2	45.7092	14.033	22.7865	18.8361	0	0.49851		27.3823	14.6211	19.3182	16.8565	0.000451755	0.705501
NM_004357.1	CD151	46.0874	11.8825	7.75269	10.5698	0	0.168217	31.7934	16.9409	17.6296	22.6215	0	0.554504			A2	A2	A2	49.463	17.2177	9.98379	12.0072	0	0.201844		31.5177	17.1523	21.4261	20.5384	0	0.679811
NM_006377.1	UNC13B	30.9406	19.7231	121.84	52.3688	0	3.93788	28.7471	28.2472	98.6801	60.5452	0	3.4327	A1	A1	A1	A1	A1	28.1832	13.0619	108.987	46.8227	0	3.86708	A1	24.8851	22.1358	96.3317	64.3323	0	3.87106
NM_006018.1	GPR109B	11.1719	6.25254	31.4839	13.5753	1.22073e-07	2.81812	47.3655	20.9823	131.002	87.8671	1.22775e-09	2.76578	A1	A1	A1	A1	A1	20.5413	13.6338	45.7287	22.4107	0	2.22618	A1	49.9571	21.3048	148.107	99.1706	3.97157e-23	2.96468
NM_000512.2	GALNS	26.33	16.7632	69.2797	32.2894	5.39144e-10	2.6312	23.2398	11.0207	51.4995	15.3979	0	2.216	A1	A1	A1	A1	A1	32.9403	14.7235	71.5892	31.9126	0	2.1733	A1	22.1914	9.37491	48.2609	13.8456	0	2.17475
NM_005716.1	GIPC1	43.8665	24.7809	98.9366	26.2034	2.1827e-13	2.2554	20.7084	8.8055	46.9038	30.675	2.34879e-08	2.26496	A1	A1	A1	A1	A1	37.6209	19.6928	82.2048	24.4629	0	2.18509	A1	24.2253	9.70947	52.1463	30.3244	5.42617e-17	2.15256
NM_005532.1	IFI27 (includes EG:3429)	15.0538	12.9035	50.2042	37.621	0.0086137	3.33498	10.4617	11.9733	54.1262	40.119	0	5.17373		A1	A1	A1	A1	16.7318	12.0652	45.245	36.651	1.619e-07	2.70413	A1	8.59458	9.34337	52.5294	39.0958	0	6.11193
NM_006670.1	5T4	62.6934	14.8942	237.573	232.346	2.1883e-14	3.78945	106.099	82.2843	258.685	233.846	3.13473e-08	2.43814		A1	A1	A1	A1	57.5745	21.203	212.775	189.165	2.76189e-31	3.69565	A1	109.001	77.5123	258.746	230.334	2.01617e-13	2.3738
NM_002965.2	S100A9	15.3964	11.7216	43.5736	28.5121	0.000147772	2.83011	5.03844	5.68544	21.8598	14.641	2.06461e-12	4.3386		A1	A1	A1	A1	14.4773	10.0476	39.5902	29.4237	1.69943e-09	2.73464	A1	5.13478	5.46754	20.3481	14.2125	0	3.96281
NM_004126.1	GNG11	27.8402	19.8054	51.0675	31.2261	0.000136977	1.83431	5.21169	9.04808	36.4795	35.9547	1.88625e-08	6.99955		A1	A1	A1	A1	21.0256	16.2345	56.2957	31.821	0	2.67749	A1	8.31847	10.8428	35.1869	34.1717	0	4.22997
NM_014333.1	IGSF4	269.436	10.5838	593.998	360.129	8.14167e-258	2.2046	114.428	97.9212	435.32	304.95	0	3.80432		A1	A1	A1	A1	286.306	46.4439	573	288.003	8.96071e-95	2.00136	A1	110.848	93.7216	430.76	297.913	0	3.88603
NM_007021.1	C10ORF10	21.4386	17.9946	120.32	74.7757	0.000850814	5.61229	8.88227	11.8177	26.566	22.9327	2.42552e-10	2.9909		A1	A1	A1	A1	15.7887	16.3045	141.047	85.5567	0	8.93338	A1	16.3247	20.7212	34.5669	22.1068	0	2.11746
NM_001276.1	CHI3L1	3.24112	5.35213	153.054	96.7703	0	47.2227	9.75508	13.7981	41.315	53.8499	6.66134e-16	4.23523		A1	A1	A1	A1	6.31943	5.6535	136.426	72.8682	0	21.5884	A1	9.66687	12.0989	40.989	56.3134	0	4.24016
NM_012261.1		142.976	153.883	678.326	390.119	0	4.74434	36.2471	36.3092	333.903	439.08	3.33067e-15	9.21188		A1	A1	A1	A1	110.107	109.096	479.562	277.926	0	4.35544	A1	35.971	32.1153	314.852	411.814	0	8.75295
NM_016382.1	CD244	15.4997	12.5318	37.0816	41.8796	0.312163	2.3924	8.38649	5.07233	33.7957	17.5098	0	4.02978		A1	A1	A1	A1	9.41884	7.7281	30.2728	27.3015	1.16962e-11	3.21407	A1	10.5551	7.87047	31.016	17.6549	0	2.93847
NM_29383.1	IFNG	27.718	19.0698	61.2007	56.6587	0.312408	2.20798	11.6536	8.23004	25.8915	19.2156	0	2.22175		A1	A1	A1	A1	33.413	27.6194	87.2379	86.5744	7.37806e-05	2.6109	A1	13.2692	6.50424	27.1774	17.5762	2.22045e-16	2.04816
NM_003830.1	SIGLEC5	19.4591	12.4734	44.2554	23.5823	0.000909564	2.27428	11.9911	9.04509	29.2249	22.0963	1.43772e-05	2.43723		A1	A1	A1	A1	13.811	9.61522	41.2476	18.9836	0	2.98658	A1	13.0548	9.02401	32.0545	24.6851	6.57249e-09	2.45537
NM_000849.1	GSTM3	20.4151	12.8768	64.6223	40.2408	0.000137314	3.16542	49.4949	46.6189	80.408	40.4794	3.4264e-08	1.62457	A1		A1	A1	A1	20.3463	11.7438	57.6777	31.5576	0	2.8348		49.118	50.3171	80.9976	37.7063	0	1.64904
NM_002758.1	MAP2K6	122.07	41.3592	404.483	306.426	8.53145e-10	3.31353	216.819	137.594	363.432	147.228	2.26597e-12	1.6762	A1		A1	A1	A1	101.139	46.6685	347.024	232.732	0	3.43116		211.027	140.167	359.248	146.642	0	1.70238
NM_004833.1	AIM2	238.784	88.2849	627.135	104.775	0	2.62637	189.633	113.948	358.067	140.377	0	1.88821	A1		A1	A1	A1	250.231	90.4652	565.493	114.873	0	2.25989		191.782	114.482	361.605	143.593	0	1.8855
NM_002372.1	MAN2A1	59.7073	44.444	149.618	41.7011	0	2.50586	52.6681	15.7472	88.117	39.9865	3.73284e-09	1.67306	A1		A1	A1	A1	62.5679	42.4204	139.623	36.2188	0	2.23154		49.8064	15.4403	85.2735	39.8473	2.50339e-16	1.7121
NM_002200.1	IRF5	146.279	19.8891	357.444	70.9876	0	2.44359	236.608	54.4362	376.417	94.5905	0	1.59088	A1		A1	A1	A1	180.735	43.3884	399.005	90.5209	0	2.20768		234.55	61.743	368.599	94.3507	0	1.57151
NM_006398.1	UBD	132.426	46.3464	1477.26	1230.77	6.24632e-47	11.1554	62.6511	28.3584	114.565	72.9993	7.10235e-05	1.82862	A1		A1	A1	A1	155.134	58.3344	1548.87	1223.24	0	9.9841		65.9296	23.0207	121.625	74.0336	1.53269e-12	1.84477
Cluster Incl. AW050627	CENTA1	142.462	51.138	315.661	55.9061	0	2.21575	138.905	28.7618	242.742	61.5819	0	1.74753	A1		A1	A1	A1	150.458	51.0259	311.623	59.7664	0	2.07116		139.088	31.9354	239.654	56.8907	0	1.72304
NM_005103.2	FEZ1	96.6812	19.4704	955.977	428.427	0	9.88793	162.796	153.251	291.131	181.444	0.000415832	1.78832	A1		A1	A1	A1	76.2715	23.054	894.965	340.657	0	11.7339		154.85	135.373	291.767	180.168	8.24531e-07	1.88419
NM_006274.1	CCL19	4.68409	4.45538	45.1347	39.0387	8.88947e-08	9.63573	7.52543	6.60287	14.123	7.80094	6.90559e-14	1.87671	A1		A1	A1	A1	4.7304	3.89251	29.3841	23.2685	0	6.21176		7.55704	5.82216	14.364	8.99747	0	1.90074
NM_013451.1	FER1L3	5.7128	6.05176	113.067	55.0721	0	19.7918	9.198	14.4681	16.0129	24.23	0.436576	1.74091	A1		A1	A1	A1	3.69904	4.81802	162.943	89.8903	0	44.0501		11.4301	13.7476	15.2988	21.9938	0.350338	1.33847
NM_003810.1	TNFSF10	94.7288	63.9395	261.424	120.413	2.90167e-05	2.75971	139.328	87.4053	205.713	129.295	0.143071	1.47646	A1		A1	A1	A1	82.1667	53.7027	188.595	87.3482	0	2.29527		124.656	72.7673	190.115	111.82	0.0048313	1.52511
NM_001992.2	F2R	4.00894	3.51041	23.2118	16.9657	4.88712e-10	5.79002	7.53541	8.181	15.4536	18.6391	0.702088	2.05079	A1		A1	A1	A1	3.22234	4.01462	30.3536	18.9791	0	9.41973		8.38551	8.74919	15.1042	19.131	0.0211502	1.80123
NM_005178.1	BCL3	51.2643	14.4385	132.679	51.3411	1.0435e-16	2.58813	66.1097	36.5202	86.7766	37.8068	0.0031066	1.31262	A1		A1	A1	A1	52.5299	16.3114	136.023	49.2705	0	2.58945		61.3302	34.4135	80.6162	37.9819	0.000197628	1.31446
NM_006207.1	PDGFRL	3.73613	4.55344	27.5648	18.2951	0	7.37791	2.15308	2.96167	5.87741	5.70809	5.06184e-08	2.72976	A1		A1	A1	A1	4.20997	4.28731	22.8051	12.9664	0	5.41693		4.07748	4.32473	5.73756	5.16893	0.000228514	1.40713
NM_002183.1	IL3RA	3.27515	3.00469	47.2218	13.7424	0	14.4182	8.47142	7.80346	36.0447	56.2372	0.543458	4.25486	A1		A1	A1	A1	13.4239	13.8083	56.2445	15.1258	0	4.18989		12.3269	14.8332	39.6807	57.0473	0.401008	3.21903
NM_005624.1	CCL25	14.9476	15.9285	35.508	12.5229	0	2.37549	20.401	8.65996	28.8484	13.4859	0.0287484	1.41406	A1		A1	A1	A1	13.3283	10.961	30.0602	12.3926	0	2.25537		19.5226	9.26084	27.2274	13.3959	0.00559089	1.39466
NM_013345.1	GPR132	23.2681	18.1607	70.2679	30.1721	3.55764e-11	3.01992	10.3213	9.9074	17.0457	14.1767	5.19816e-06	1.65151	A1		A1	A1	A1	46.8471	27.938	101.533	36.8216	0	2.16733		11.7606	10.298	20.2162	16.054	3.20921e-12	1.71897
NM_000147.1	FUCA1	141.799	35.4824	564.049	289.694	1.34136e-28	3.97779	343.921	33.1348	443.593	279.747	0.000591756	1.28981	A1		A1	A1	A1	129.728	46.3705	537.27	277.61	0	4.14151		340.861	39.8578	461.786	301.275	2.16271e-08	1.35476
NM_005375.1	MYB	262.828	36.9475	158.525	91.4602	0	0.603153	455.328	95.5503	204.316	113.918	0	0.448723		A2	A2	A2		363.427	119.936	226.402	167.2	0	0.622964	A2	444.185	95.2148	202.141	120.232	0	0.455083
NM_002848.2	PTPRO	35.4664	27.6402	9.39716	7.62151	0.000488969	0.264959	33.3134	19.245	11.3339	8.44831	5.38737e-16	0.340221		A2	A2	A2		21.79	21.0546	7.28975	6.44049	0.0118026	0.334546	A2	31.6308	17.5589	13.3143	8.64863	0	0.420928
AL389886	SLC23A2	27.9318	24.0652	14.9597	18.0066	0.203074	0.53558	55.4858	30.3426	16.9399	12.3014	0	0.305301		A2	A2	A2		33.6837	25.8939	18.225	21.4733	5.23523e-09	0.541063	A2	57.4527	32.2275	18.9823	12.4764	0	0.3304
NM_005306.1	FFAR2	28.7808	21.8239	12.5009	8.69288	0.0987278	0.434349	31.809	27.4257	6.32176	5.74958	2.46572e-07	0.198741		A2	A2	A2		18.6857	13.987	9.62608	6.99221	4.12412e-06	0.515157	A2	30.6667	27.9107	7.25933	5.17612	1.45727e-10	0.236717
NM_005010.1	NRCAM	97.3899	106.232	62.2437	80.8447	0.33284	0.639118	80.019	79.4376	26.5877	33.7154	3.67347e-05	0.332267		A2	A2	A2		94.1621	97.9044	64.1179	74.1802	0.226728	0.680932	A2	80.6034	78.0731	26.3003	31.8341	4.63753e-08	0.326293
NM_003839.1	TNFRSF11A	9.12076	9.64176	6.16665	7.5275	0.848661	0.676112	32.1366	26.3068	9.27948	8.69531	0	0.288751		A2	A2	A2		9.41809	10.8897	6.23556	6.58956	0.796577	0.662084	A2	29.204	27.618	11.01	9.51063	0	0.377005
BC001638.1	ASCL1	102.781	42.1001	54.6323	108.63	0	0.53154	296.475	428.367	56.7372	50.0564	2.65314e-10	0.191373		A2	A2	A2		152.663	61.5128	100.433	194.289	0	0.657878	A2	326.19	464.967	67.494	65.2019	7.23625e-17	0.206916
NM_005504.1	BCAT1	256.145	166.31	177.36	123.432	0.212086	0.69242	274.963	144.228	129.345	60.5663	9.06882e-12	0.470411		A2	A2	A2		265.031	164.654	177.714	128.013	3.80749e-06	0.670542	A2	268.004	133.679	120.202	51.968	0	0.448509
NM_005024.1	SERPINB10	153.112	120.133	107.793	78.6162	0.491601	0.704015	288.229	121.793	114.658	84.1578	0	0.3978		A2	A2	A2		142.978	95.8485	101.879	70.9902	0.0016566	0.712547	A2	286.516	114.877	114.694	79.8263	0	0.400305
NM_022367.1	SEMA4A	210.336	45.8436	317.176	80.9072	7.95628e-06	1.50795	142.52	63.2639	290.561	77.0963	0	2.03874		A1	A1	A1		191.214	57.5216	265.132	79.0089	3.85477e-12	1.38657	A1	137.163	52.7742	276.757	72.1293	0	2.01773
NM_005567.2	LGALS3BP	17.2552	19.1296	40.0995	34.3763	0.0301413	2.32391	6.67723	7.07811	35.2956	21.3832	0	5.28597		A1	A1	A1		15.2357	12.7546	40.5089	36.5814	0.000454696	2.65882	A1	7.49778	6.72201	32.129	21.7156	0	4.28513
NM_005771.1	DHRS9	35.728	23.0624	80.4315	65.734	0.0214376	2.25122	26.9394	6.28411	59.114	34.6303	1.8433e-26	2.19433		A1	A1	A1		38.1285	20.049	75.2266	61.5839	4.99763e-09	1.97298	A1	28.4202	11.9593	60.744	34.9036	2.44249e-15	2.13736
NM_001775.1	CD38	105.869	71.4588	211.885	148.312	0.0603064	2.00139	59.5766	28.3489	199.074	161.23	5.14147e-12	3.34149		A1	A1	A1		118.024	68.7212	189.243	135.522	0.00232069	1.60342	A1	62.5922	34.1556	194.626	149.536	1.35614e-13	3.10943
NM_001197.2	BIK	54.0854	26.9195	80.5675	32.6708	0.00733304	1.48964	7.79745	8.74307	33.9475	27.3737	0	4.35367		A1	A1	A1		60.7954	39.2832	103.239	42.0695	0	1.69815	A1	15.8857	21.6251	37.8425	26.3279	0	2.38217
NM_016323.1	HERC5	219.828	108.05	361.403	145.114	0.00174727	1.64403	136.227	95.6516	303.28	134.571	3.32502e-08	2.22629		A1	A1	A1		219.23	110.376	296.922	118.281	3.29648e-10	1.35438	A1	136.88	96.0909	300.706	126.902	0	2.19686
NM_013351.1	TBX21	61.6622	54.7744	122.087	129.36	0.579903	1.97993	15.4686	10.447	56.3861	20.673	0	3.6452		A1	A1	A1		70.7408	56.795	120.023	119.636	0.020993	1.69666	A1	20.4414	10.0115	60.3104	21.1463	0	2.95041
NM_013371.1	IL19	13.124	9.58405	17.1659	12.0515	0.849785	1.30798	8.40301	6.51757	31.9633	13.8799	0	3.80379		A1	A1	A1		12.3663	8.76838	17.5996	12.6272	0.0205656	1.42319	A1	12.6749	12.0431	32.386	13.846	0	2.55512
NM_001236.2	CBR3	15.1976	17.6309	5.55819	6.75134	0.0549066	0.365728	29.9332	29.8603	2.02579	0.899471	3.67243e-82	0.0676771		A4	A4	A4
NM_002899.2	RBP1	2.70646	3.2493	29.0463	14.8569	0	10.7322	7.0583	6.26384	16.2905	15.0978	0.0579803	2.308	A3			A3
NM_002966.1	S100A10	81.1574	11.8917	40.6028	37.7649	0	0.500298	118.577	33.0018	39.6071	24.3121	0	0.33402		A2	A2	A2
NM_000676.1	ADORA2B	25.5648	18.9899	17.7255	25.9306	0.0209469	0.693357	65.3724	53.6618	16.8641	14.3055	6.32438e-14	0.25797		A2	A2	A2
NM_004117.1	FKBP5	79.4786	37.0459	76.4044	105.955	0.00221382	0.96132	73.7064	72.3117	25.5051	19.7594	1.7469e-08	0.346036		A2	A2	A2
NM_005715.1	UST	47.6585	41.1118	31.8085	37.1811	0.00490843	0.667425	88.4006	38.3292	42.7091	28.1415	8.86624e-13	0.483131		A2	A2	A2
NM_004944.1	DNASE1L3	69.3452	12.7252	47.9819	19.7809	6.26299e-08	0.691928	120.639	75.7027	50.7119	8.76239	1.89138e-47	0.420362		A2	A2	A2
NM_000565.1	IL6R	24.1081	22.0396	9.93691	8.34858	0.786499	0.412182	33.2538	23.4129	14.9129	11.7842	9.35955e-09	0.448457		A2	A2	A2
NM_003483.2	HMGA2	66.7339	69.4311	52.3234	60.7434	0.0583911	0.784062	44.4333	50.2471	14.4499	14.8622	6.39946e-05	0.325205		A2	A2	A2
AA243143	ARF6	268.999	90.7673	202.918	54.0617	0.014977	0.754346	534.4	284.062	266.748	98.0044	8.18355e-16	0.499155		A2	A2	A2
AJ224869	CXCR4	266.604	100.61	181.234	108.439	0.00127002	0.679789	965.333	289.465	409.549	340.626	0	0.424257		A2	A2	A2
NM_017412.1	FZD3	13.4599	9.24082	11.807	6.72929	0.868537	0.877199	48.5501	31.0036	20.7948	8.84828	5.61496e-08	0.428315		A2	A2	A2
NM_006720.1	ABLIM1	214.081	105.975	97.9238	24.792	3.61256e-11	0.457414	246.914	75.5778	175.014	47.2039	8.57483e-09	0.708808	A2			A2
AL137749.1	ISYNA1	56.3477	13.2492	20.8124	24.8829	0	0.369356	39.3391	6.68889	28.4786	14.8141	0	0.723925	A2			A2
AA827892	?	405.763	167.388	196.144	41.2104	6.56817e-13	0.483396	282.232	179.928	208.339	78.7974	0.0706402	0.738183	A2			A2
U54826.1	SMAD1	142.726	103.592	190.415	92.3093	0.0417474	1.33413	84.2989	66.8106	233.719	101.346	0	2.7725		A1	A1	A1
AI951454	SPR	48.0988	37.4204	70.5468	42.3619	0.185878	1.46671	26.2833	17.6486	61.5779	23.2396	0	2.34286		A1	A1	A1
AL050152.1	LMO3	26.8699	20.7456	37.0495	38.5585	0.540893	1.37885	11.3079	8.88892	27.141	23.2998	3.34794e-08	2.40018		A1	A1	A1
NM_004692.1	INA	15.7514	16.043	10.807	9.50254	0.65074	0.686095	5.50343	6.79785	22.1544	15.9941	5.93624e-10	4.02556		A1	A1	A1
NM_005101.1	G1P2	1662.42	890.009	2202.23	1008.63	0.0810073	1.32471	874.703	539.533	2008.42	990.994	0	2.29612		A1	A1	A1
NM_006757.1	TNNT3	9.10339	8.34465	13.7564	10.1844	0.0715957	1.51113	14.718	8.93462	30.9492	13.7614	1.45145e-08	2.10281		A1	A1	A1
NM_002286.3	LAG3	14.3256	15.5845	21.7251	17.8552	0.557566	1.51652	3.89128	6.86348	38.5811	60.7262	2.63866e-07	9.91475		A1	A1	A1
NM_001504.1	CXCR3	27.6775	13.1107	59.5749	58.051	0.258684	2.15246	12.8839	11.4149	26.845	17.461	6.01741e-12	2.0836		A1	A1	A1
AL573058	C1R	33.2122	14.3297	45.3856	14.8014	0.0217821	1.36654	10.1178	9.06087	25.4923	9.0823	0	2.51955		A1	A1	A1
NM_004758.1	BZRAP1	20.6866	7.19085	49.4771	12.7919	2.88658e-15	2.39174	15.5428	7.73124	24.277	12.6195	5.40154e-08	1.56194	A1		A1	A1
BC001120.1	Galectin 3	780.278	553.775	1624.77	627.935	2.0296e-08	2.0823	916.467	448.893	1192.29	260.45	1.38556e-13	1.30096	A1		A1	A1
AW044631	ARHGAP5	18.6851	6.46532	37.8197	17.4046	6.47128e-05	2.02405	22.9295	14.2761	32.5822	13.7834	0	1.42097	A1		A1	A1
NM_013401.1	RAB3IL1	13.0863	11.2281	28.7126	9.40915	1.39364e-11	2.19409	38.8925	18.5206	52.0041	9.77973	0	1.33712	A1		A1	A1
NM_003254.1	TIMP1	524.287	112.862	1087.12	399.219	2.39833e-15	2.07352	798.109	309.859	1108.37	557.399	0.000313723	1.38874	A1		A1	A1
NM_006291.1	TNFAIP2 (includes EG:7127)	92.6902	14.4566	233.192	127.396	1.60272e-40	2.51582	108.173	62.2041	157.033	107.913	0.00312214	1.45169	A1		A1	A1
NM_002036.1	DARC	9.19038	7.43724	33.7828	17.2123	1.83853e-12	3.67589	7.40973	5.34851	12.5946	13.2327	0.246722	1.69974	A1		A1	A1
U16996.1	DUSP5	266.911	63.4305	595.335	288.654	3.04317e-14	2.23046	255.781	171.579	339.191	89.8598	0	1.3261	A1		A1	A1
NM_022978.1		16.5989	13.5797	39.1829	14.4155	5.20223e-09	2.36057	13.901	8.51067	22.2794	13.569	0.00866869	1.60273	A1		A1	A1
NM_000585.1	IL15	112.572	36.9539	222.018	66.4804	7.74309e-07	1.97223	201.396	34.4104	263.481	71.192	7.76891e-09	1.30828			A1	A1	A1	132.446	52.7222	279.336	80.905	0	2.10907		192.175	34.7568	255.081	67.2863	3.06841e-17	1.32734
AF037334.1	EPHB1	26.1255	25.6256	62.5693	36.061	0	2.39495	29.4072	44.0974	54.2301	34.2865	1.7035e-08	1.84411			A1	A1	A1	30.6055	30.0146	62.2462	25.6723	0	2.03382		29.8964	42.7705	54.5771	36.783	9.22529e-12	1.82554
NM_015507.2	EGFL6	5.20432	5.59695	45.3591	56.201	8.10579e-06	8.71566	7.1166	7.24196	17.875	16.8541	0	2.51173			A1	A1	A1	7.25734	6.03313	37.2367	41.3084	0	5.1309		6.44928	5.61543	16.4211	18.2894	1.72751e-12	2.54619
NM_025239.1	PDCD1LG2	12.925	10.0115	53.7619	16.5942	0	4.15953	22.4407	32.7967	34.3782	29.3724	0	1.53196			A1	A1	A1	8.85318	9.36259	42.1781	21.2814	0	4.76418		19.3834	27.3604	32.13	28.9434	4.44089e-15	1.65761
NM_002402.1	MEST	19.9977	9.6412	43.3361	27.1957	0.00161198	2.16705	38.1002	30.1431	140.894	245.646	0.0064107	3.69799			A1	A1	A1	17.5403	8.42415	35.5211	21.2338	4.44089e-16	2.02511	A1	40.9549	30.2425	151.986	260.885	4.80981e-05	3.71107
NM_002847.1	PTPRN2	3.20526	2.15824	29.2188	32.1383	2.35691e-09	9.11589	0.999585	0.941069	8.26015	11.9147	0.000764634	8.26358			A1	A1	A1	3.78329	5.20092	20.4749	23.4905	1.03839e-06	5.41194		1.21098	1.46201	9.03995	16.5909	8.99078e-06	7.465
NM_001091.1	ABP1	5.10631	5.18836	42.7115	60.6329	0.000774217	8.36446	5.39802	5.34972	12.3955	8.55465	0.022699	2.2963			A1	A1	A1	8.83645	7.19573	39.705	46.5317	1.22253e-09	4.49331		6.16333	5.74498	11.1637	7.0457	1.44407e-08	1.81131
NM_000422.1	KRT17	10.2704	9.1813	36.8845	30.3082	0.00034849	3.59135	12.9326	14.4645	35.8711	33.1185	0.0160672	2.77371			A1	A1	A1	9.68171	7.63647	37.6425	22.0618	0	3.888		12.0642	12.1661	33.6765	38.6657	0.00158335	2.79145
NM_000216.1	KAL1	0.542217	1.01402	146.426	267.453	0.00383949	270.05	4.58048	4.91393	35.58	77.5456	0.552308	7.76774			A1	A1	A3	0.883194	1.99794	119.546	202.639	5.71654e-23	135.357		3.34917	4.40822	33.8566	72.7519	0.467005	10.1089
NM_000600.1	IL6	11.5058	7.35324	34.5251	18.2593	0.0269445	3.00068	13.7515	9.99862	26.2081	29.2525	0.0976552	1.90584			A1	A1	A1	11.2068	6.75297	45.6294	19.6621	0	4.07158		17.2325	10.234	27.4752	26.5934	0.108832	1.59438
NM_005114.1	HS3ST1	3.50402	5.09095	45.4791	50.0581	0.0692503	12.9791	11.6326	6.01951	20.3618	17.2395	0.159778	1.75041			A1	A1	A1	3.69784	4.83761	41.5244	36.278	0	11.2294		11.1683	6.70059	22.2101	17.5884	0.000817017	1.98868
NM_000163.1	GHR	124.987	142.248	270.58	257.899	7.47202e-12	2.16487	24.8668	32.9015	306.578	621.883	5.89592e-08	12.3288			A1	A1	A1	102.786	116.477	241.886	211.571	0	2.35329	A1	22.0198	29.6628	288.968	583.479	3.35357e-07	13.1231
NM_004796.1	NRXN3	5.1102	6.81854	26.9932	30.5855	0.142428	5.28222	8.27573	11.0038	15.0643	28.7539	3.39218e-12	1.8203			A1	A1	A1	6.18162	9.80715	20.1972	21.1438	5.00331e-06	3.26729		6.49866	9.63987	15.2673	28.8961	8.01164e-08	2.34929
NM_005330.2	HBE1	9.34018	8.45774	52.8326	47.4108	8.07457e-05	5.65649	6.72955	6.36945	15.5407	10.5848	6.51246e-05	2.30933			A1	A1	A1	6.80629	5.87057	44.2575	37.5827	1.63208e-28	6.50244		8.25749	7.62978	14.325	9.59431	5.31146e-05	1.73479
NM_006240.1	PPEF1	7.49697	6.87754	38.8916	54.4385	0.000246547	5.18765	7.2281	6.16786	14.7953	11.8987	3.4006e-05	2.04691			A1	A1	A1	7.40454	8.74378	36.3488	52.5847	1.31006e-14	4.90899		8.64681	6.25525	12.1453	11.1636	0.0614438	1.40459
AL574096	TFPI2	6.9609	4.60858	27.598	24.8846	0.000262794	3.96471	4.44034	4.71066	12.8659	10.5072	0	2.8975			A1	A1	A1	8.88524	8.42543	30.6151	23.0423	1.93356e-11	3.44562		4.81711	3.67466	12.9694	11.3272	1.10983e-05	2.69237
AF119873.1	SERPINA1	28.9907	30.1088	320.437	378.029	0.305962	11.0531	10.9195	8.41225	17.6156	15.3853	7.92214e-06	1.61323			A1	A1	A1	26.7398	26.5429	274.935	304.005	8.5655e-07	10.2819		10.2569	9.46228	16.4074	13.8931	0.000403551	1.59964
BG054844	RND3	34.7042	8.70932	129.323	78.9375	1.46082e-24	3.72643	32.5973	34.0242	98.2233	181.866	0.401267	3.01324			A1	A1	A1	37.4549	12.7005	194.255	110.884	0	5.18638		41.91	54.0295	114.766	213.082	0.0711258	2.73838
U77914.1	JAG1	32.5255	19.9874	113.927	221.366	0.689241	3.50269	23.5035	12.86	169.71	312.989	1.03544e-08	7.22061			A1	A1	A1	44.473	35.9608	127.145	182.372	6.03885e-05	2.85894	A1	21.5358	12.0921	189.242	336.74	3.41965e-22	8.78732
NM_014556.1	EVC	0.0885227	0.153265	27.9542	23.1562	1.25383e-09	315.786	17.9221	33.1074	25.2552	52.4238	0.900917	1.40917			A1	A1	A3	0.483623	1.44672	29.7833	29.7557	0	61.5837		13.3059	25.8358	22.7324	48.7833	0.879761	1.70844
NM_018643.1	TREM1	16.1263	9.94856	80.7137	77.0438	0.0028142	5.00509	14.5949	10.2653	24.3366	21.6178	0.00786089	1.66748			A1	A1	A1	16.7844	11.2782	66.9952	57.2319	0	3.99151		15.353	7.86397	24.5059	21.7089	0.0221926	1.59616
NM_005427.1	TP73	13.784	10.9394	33.8457	9.19232	0	2.45542	14.7148	6.12012	22.2228	13.3527	0.201135	1.51024			A1	A1	A1	14.5748	11.1574	29.8106	11.2224	0	2.04536		12.66	7.20669	21.6534	13.0685	7.17534e-08	1.71038
NM_016202.1		33.2493	29.3812	63.2143	34.2943	0.000126869	1.90122	34.9535	21.1306	66.6301	32.8741	5.9952e-15	1.90625			A1	A1	A1	16.9837	18.7276	52.9745	29.9318	0	3.11913		36.006	21.8157	62.3166	36.2512	9.50573e-13	1.73073
BE311760	HMGB1	1797.33	371.15	1204.74	349.383	2.5879e-06	0.670295	1399.26	236.364	991.46	202.106	2.08233e-17	0.708562			A2	A2
NM_000179.1	MSH6	377.113	43.085	258.739	55.1807	0	0.686105	374.483	63.8214	281.176	38.7142	8.85031e-22	0.750837			A2	A2
NM_001211.2	BUB1B	344.91	57.3476	204.279	38.0513	1.77636e-15	0.592269	360.34	56.3912	274.429	62.3756	2.08722e-14	0.761584			A2	A2
NM_014264.1	PLK4	150.202	25.5087	92.8598	12.1055	1.48106e-19	0.618235	214.6	64.5518	159.169	51.4672	3.70822e-05	0.741697			A2	A2
NM_001274.1	CHEK1	149.605	9.5589	81.7764	13.727	0	0.546614	173.43	36.9144	127.926	46.8779	1.62714e-12	0.737622			A2	A2
NM_017425.1	SPA17	49.9571	15.1435	31.372	9.04457	9.27884e-05	0.627979	33.2005	11.0268	21.6013	10.33	3.26811e-09	0.650632			A2	A2
NM_004298.1	NUP155	160.549	16.9238	88.7562	20.5018	0	0.552829	157.702	44.3501	107.61	21.3783	9.39357e-15	0.682364			A2	A2
NM_030941.1	LOC81691	89.4141	12.8093	50.4795	20.0679	0	0.564559	65.4495	24.8098	46.2854	15.4922	8.43193e-05	0.707192			A2	A2
U30872.1	CENPF	27.3501	5.69112	18.3774	3.35958	1.80627e-07	0.671932	23.0423	8.98578	15.1896	5.86566	9.89486e-08	0.659204			A2	A2
L22431.1	VLDLR	99.4289	12.9839	55.7875	23.7031	0	0.56108	108.049	24.4808	82.199	19.698	3.49857e-08	0.760756			A2	A2
NM_000819.1	GART	311.959	21.6688	232.78	62.5855	0	0.746189	334.785	28.0928	244.748	44.8578	0	0.73106			A2	A2
NM_006346.1	C13ORF24	65.1154	11.9761	40.9303	14.2399	2.45135e-11	0.628581	77.294	29.1012	57.9484	13.3805	1.8675e-07	0.749714			A2	A2
NM_023010.1	UPF3B	230.279	65.0696	117.077	38.2423	4.30311e-08	0.508413	278.148	66.0865	201.992	42.7032	1.59071e-14	0.726204			A2	A2
NM_018656.1	BLOV1	102.495	30.8323	64.6904	18.6005	2.21659e-05	0.631158	131.285	34.0549	81.3215	22.9602	4.57732e-18	0.619426			A2	A2
NM_020242.1	KIF15	178.685	30.8329	97.3195	10.6074	0	0.544644	195.182	62.137	148.193	28.5177	3.68088e-09	0.759255			A2	A2
NM_012415.1	RAD54B	183.448	56.3283	108.39	19.555	4.16033e-11	0.590851	302.77	88.1204	218.931	72.0913	9.40949e-07	0.723092			A2	A2
NM_022353.1	LOC64172	93.4478	13.9499	69.4037	11.0472	3.29321e-06	0.7427	109.011	22.6825	80.484	27.1566	2.38431e-12	0.738312			A2	A2
NM_016947.1	?	1105.29	121.911	701.087	128.505	0	0.634298	1606.22	489.782	1174.2	323.465	1.79847e-06	0.731031			A2	A2
NM_014547.1	TMOD3	34.1709	9.4581	21.9241	7.82519	1.40818e-05	0.641601	58.0147	18.4935	38.415	9.88518	1.09439e-11	0.662159			A2	A2
AL022316	?	148.375	39.684	95.6009	20.6735	8.66685e-07	0.644318	113.221	11.2654	85.1165	14.1045	0	0.75177			A2	A2
AA187563:zp66g11.r1	?	291.061	50.8282	178.941	42.5763	1.96582e-10	0.614786	313.67	66.1987	218.958	57.9117	5.16978e-14	0.698051			A2	A2
NM_002462.1	MX1	1526.44	388.826	2249.15	1080.03	0.00298429	1.47346	1222.42	461.498	1907.66	358.467	0	1.56056			A2	A2
NM_016562.1	TLR7	65.9736	19.1919	109.726	51.8453	0.000742058	1.66317	50.6689	15.7224	89.2645	22.3803	0	1.76172			A1	A1
NM_004184.2	WARS	1875.8	509.277	3629.62	894.622	5.9488e-12	1.93497	1243.93	559.364	1618.37	580.18	9.90034e-05	1.30102			A1	A1
NM_001908.1	CTSB	74.6017	24.5142	118.988	27.0965	8.59721e-08	1.59497	74.312	23.7314	98.0252	13.5471	0	1.3191			A1	A1
AI078167	NFKBIA	2037.15	320.689	2745.49	305.39	5.03355e-11	1.34772	1509.71	353.168	2015.37	249.953	0	1.33494			A1	A1
NM_004335.2	BST2 (includes EG:684)	766.253	63.8575	1038.34	180.971	4.31914e-17	1.35508	612.376	98.8694	803.941	257.427	3.54758e-09	1.31282			A1	A1
NM_004223.1	UBE2L6	758.006	203.6	1088.53	215.135	4.32245e-05	1.43604	581.892	144.938	827.794	189.303	3.87779e-12	1.42259			A1	A1
NM_002103.1	GYS1	234.072	28.6948	305.724	26.8489	4.79616e-14	1.30611	234.231	79.5954	325.295	86.7786	1.11132e-10	1.38878			A1	A1
NM_000527.2	LDLR	246.735	41.1891	341.54	49.3099	1.67137e-09	1.38423	147.681	36.2391	231.436	65.199	8.43325e-13	1.56713			A1	A1
NM_030662.1	MAP2K2	416.871	54.4314	563.594	63.7631	1.0479e-10	1.35196	265.109	116.298	481.107	230.789	8.375e-10	1.81475			A1	A1
NM_006254.1	PRKCD	210.284	60.5558	304.235	53.0522	3.5574e-09	1.44678	155.846	52.588	215.304	70.1414	7.63984e-07	1.38152			A1	A1
BE622627	PIK3R3	164.723	28.993	251.495	67.926	8.30925e-08	1.52677	89.3772	22.0687	117.242	36.529	3.25195e-05	1.31176			A1	A1
NM_006084.1	ISGF3G	495.066	79.1367	715.647	128.392	4.41894e-08	1.44556	449.845	65.0589	587.517	85.8845	0	1.30604			A1	A1
BF055171	ACOX3	38.7178	17.8473	62.8357	13.7651	6.48786e-09	1.62292	41.2664	11.2325	61.4013	8.6322	0	1.48792			A1	A1
NM_006875.1	PIM2	322.444	203.299	552.544	100.039	0	1.71361	329.76	69.9434	512.692	233.181	5.4049e-11	1.55474			A1	A1
BE560461	SLC2A5	217.469	71.6978	349.326	48.6598	0	1.60632	294.578	112.631	535.399	287.871	1.89461e-08	1.81751			A1	A1
NM_012383.1	OSTF1	205.144	89.8019	319.538	25.034	0	1.55763	135.44	19.3633	183.073	45.9646	1.83994e-15	1.35169			A1	A1
NM_002162.2	ICAM3	752.072	47.0783	1150.75	206.611	8.05472e-60	1.5301	693.221	170.754	1084.76	443.109	9.62751e-10	1.56481			A1	A1
NM_000166.1	GJB1	11.9909	7.96062	22.0004	5.10419	4.30767e-14	1.83477	16.0971	10.7617	26.2506	11.0935	2.92933e-10	1.63077			A1	A1
NM_006365.1		24.4439	15.0888	45.5365	11.7913	0	1.8629	28.8987	5.94961	40.6534	14.0224	3.24773e-09	1.40676			A1	A1
NM_001109.1	ADAM8	146.707	34.3291	202.361	22.135	5.61773e-14	1.37935	125.439	26.3291	178.843	45.1368	1.69967e-11	1.42573			A1	A1
NM_003331.1	TYK2	361.855	65.2521	500.32	79.3314	2.58102e-07	1.38265	280.2	124.955	369.443	123.966	3.20197e-06	1.3185			A1	A1
NM_005658.1	TRAF1	474.771	160.461	824.187	90.6842	0	1.73597	317.484	146.606	437.872	168.587	2.07173e-06	1.37919			A1	A1
NM_001108.1	ACYP2	34.3942	18.0074	64.8301	19.3543	1.08399e-06	1.88491	46.3515	15.2134	71.377	17.5007	0	1.53991			A1	A1
NM_002872.2	RAC2	777.179	124.183	1209.26	312.489	7.18067e-10	1.55596	710.442	155.514	1040.22	236.135	0	1.46419			A1	A1
L11669.1		135.449	30.9276	187.947	33.7051	7.04055e-06	1.38758	144.175	67.5496	192.986	73.9623	4.42781e-05	1.33856			A1	A1
BC000324.1	GRN	249.186	55.0505	348.868	76.6045	4.68267e-05	1.40003	195.848	46.0393	300.432	104.807	3.72022e-11	1.53401			A1	A1
S49765.1	HOXB7	35.0725	15.0731	69.489	26.7636	3.64302e-05	1.98129	42.2759	15.7794	58.2223	19.0607	4.4373e-08	1.3772			A1	A1
NM_016128.1	COPG	198.686	38.4137	286.689	53.4475	5.40604e-07	1.44292	68.8928	19.8973	119.887	60.6069	9.89224e-13	1.7402			A1	A1
NM_013392.1	NRBP1	89.9711	32.3433	138.83	24.5453	6.64866e-11	1.54305	87.3975	39.8543	114.127	19.638	0	1.30584			A1	A1
NM_018697.1		157.227	18.8014	235.799	61.7319	4.47694e-16	1.49973	107.008	22.7914	152.045	48.3422	8.59204e-11	1.42088			A1	A1
NM_022365.1	DNAJC1	102.259	22.9832	148.336	41.6914	0.000102555	1.4506	124.487	30.5706	180.284	27.5343	0	1.44822			A1	A1
NM_019843.2	EIF4ENIF1	142.519	30.4947	255.538	60.929	2.08942e-11	1.79301	112.375	49.5498	146.88	42.6249	6.42683e-08	1.30705			A1	A1
NM_030641.1		61.5433	21.5894	117.028	42.2857	3.01167e-07	1.90156	29.7633	6.64014	56.1778	19.3472	5.21879e-29	1.88749			A1	A1
NM_022350.1		173.035	19.9834	232.771	57.1437	7.37643e-09	1.34522	126.715	96.5011	242.892	116.737	5.53265e-06	1.91684			A1	A1
NM_014349.1		116.49	17.114	151.61	19.3944	1.60436e-07	1.30149	82.8255	18.0973	109.004	33.3801	1.3082e-06	1.31606			A1	A1
AF147782.1	ETV7	39.0081	10.3264	72.8457	22.2847	6.42806e-07	1.86745	39.3127	18.1032	54.7923	23.2393	5.33278e-07	1.39376			A1	A1
U88964	ISG20	606.033	282.668	994.755	285.303	1.27814e-05	1.64142	484.385	120.1	807.644	437.06	1.08577e-09	1.66736			A1	A1
X60592	CD40	636.051	143.613	1051.74	152.93	2.22045e-16	1.65354	777.807	155.116	1026.6	375.703	6.4066e-07	1.31987			A1	A1
M97935		419.657	112.471	611.999	141.235	0.000105035	1.45833	365.424	117.588	551.253	159.681	2.28527e-09	1.50853			A1	A1
BF304996	RGS16	317.002	86.2716	408.286	195.35	0.109012	1.28796	103.86	41.3904	209.766	70.1669	0	2.0197		A1		A1
U19970.1	CAMP	17.2995	10.787	20.9366	18.905	0.808778	1.21024	9.63092	6.3091	28.1908	22.5918	4.96075e-08	2.92711		A1		A1
NM_001974.1	EMR1	8.35389	7.54541	41.1408	23.3214	1.24981e-10	4.92474	33.5791	14.7537	39.7543	29.5072	0.433669	1.1839	A1		A1
NM_004904.1		12.5908	15.2348	10.4427	22.5664	0.789683	0.829397	37.8302	31.0194	7.19966	4.60608	1.33721e-20	0.190315		A2		A2
NM_013259.1	TAGLN3	1.85327	1.23445	22.011	16.3436	6.02436e-16	11.8768	10.3284	10.1063	9.62739	6.91772	0.000269916	0.932124	A3
NM_004360.1	CDH1	11.4725	16.224	11.6073	20.9165	0.356426	1.01175	203.114	34.4853	14.021	11.2259	0	0.0690302		A2		A2
NM_005032.2	PLS3	301.695	333.097	340.177	185.159	1.47433e-08	1.12755	834.787	379.472	355.522	436.376	0	0.425884		A2		A2
NM_004475.1	FLOT2	117.317	24.8325	179.602	120.133	0.000525847	1.53091	255.299	282.804	102.298	41.0124	8.14774e-08	0.400699		A2		A2
AL136179	SOX4	290.23	72.2478	373.21	188.22	0.0779396	1.28591	563.154	199.505	252.674	101.207	0	0.448676		A2		A2
NM_001839.1	CNN3	65.9476	45.6041	61.6826	47.4034	0.804885	0.935327	43.7922	39.7187	14.2177	9.987	7.73156e-10	0.324662		A2		A2
BF969352	ECE1	41.3827	40.9484	56.3034	40.0198	0.00110474	1.36055	53.5888	35.1714	25.8152	10.2957	6.22732e-08	0.481728		A2		A2
NM_001560.1	IL13RA1	20.5176	10.1179	49.2057	62.7352	0.0447052	2.39822	58.1651	54.9826	14.2402	7.71542	1.10072e-23	0.244823		A2		A2
J04152	TACSTD2	81.7935	92.483	86.6355	102.037	0.652341	1.0592	42.0531	23.7166	9.4992	8.1995	0	0.225886		A2		A2
AI824012	NRIP1	16.7733	15.8571	24.2617	17.2607	3.26147e-07	1.44645	141.817	53.2312	39.4704	27.8651	0	0.278319		A2		A2
NM_000346.1	SOX9	54.8055	20.8628	255.885	236.465	2.44173e-10	4.66897	173.972	171.561	85.6074	42.421	3.77154e-05	0.492076		A2		A2
NM_003896.1	ST3GAL5	59.0195	26.0277	95.1301	54.925	0.0207586	1.61184	115.217	140.697	34.6366	13.8399	9.82807e-13	0.30062		A2		A2
NM_006264.1	PTPN13	48.2639	42.6518	50.7678	46.5542	0.212311	1.05188	58.7428	57.4585	25.0771	38.0096	1.70493e-05	0.426897		A2		A2
NM_002423.2	MMP7	15.8817	18.3487	16.9544	19.1789	0.66046	1.06754	827.817	1381.79	82.7874	114.542	3.72119e-05	0.100007		A2		A2
NM_001565.1	CXCL10	117.898	66.0491	193.848	191.266	0.609935	1.6442	276.22	257.404	58.2114	64.8318	1.45683e-09	0.210743		A2		A2
NM_002575.1	SERPINB2	2.6383	2.86572	44.5169	62.7114	0	16.8733	65.658	59.3728	7.7858	6.86608	8.08242e-14	0.118581		A2		A2
NM_004385.1	CSPG2	38.1054	18.7801	65.061	29.9018	0.0240472	1.7074	89.5619	50.3291	34.7347	14.8717	3.168e-17	0.387829		A2		A2
NM_014621.1	HOXD4	10.311	9.34769	10.4823	13.7552	0.0128317	1.01662	22.6911	32.6662	4.6275	4.6727	9.44485e-06	0.203934		A2		A2
NM_005739.2	RASGRP1	256.502	69.1645	333.033	143.292	0.0688904	1.29836	439.795	307.308	195.153	75.2035	8.49524e-22	0.443737		A2		A2
NM_014707.1	HDAC9	50.1618	26.3963	49.8262	25.4369	0.528598	0.993311	86.9469	45.3026	38.8079	16.307	1.19386e-05	0.44634		A2		A2
NM_007115.1	TNFAIP6	10.0305	6.81425	29.3237	13.3112	0	2.92346	34.9165	31.0334	11.0219	8.40576	0	0.315665		A2		A2
AI797281	DSC3	7.76289	5.3189	77.1062	95.263	0.0332918	9.93267	50.331	37.649	10.7866	7.0287	0	0.214313		A2		A2
AJ223333.1	DNMT2	22.9626	7.65267	24.2063	11.2576	0.935194	1.05416	24.0027	10.7306	11.7455	9.96892	0	0.48934		A2		A2
NM_006533.1	MIA	24.0411	7.33909	30.8235	6.00696	0.00128207	1.28212	32.4989	29.0573	12.1122	7.47633	1.00334e-06	0.372695		A2		A2
NM_000867.1	HTR2B	0.593053	0.82625	1.70891	4.12719	0.0124868	2.88155	106.696	168.306	3.35588	3.74628	2.2797e-05	0.0314526		A2		A2
NM_001559.1	IL12RB2	4.49328	6.4738	16.722	13.7014	6.09553e-09	3.72156	38.0552	49.6801	8.0149	7.5983	1.00335e-07	0.210612		A2		A2
NM_000722.1	CACNA2D1	11.7858	6.59119	9.96877	5.48117	0.651973	0.845831	28.0611	32.6703	7.81986	7.8673	3.68339e-05	0.278673		A2		A2
NM_004226.1	STK17B	95.583	41.9681	129.883	48.2386	0.0123958	1.35885	346.749	130.706	105.013	40.6852	0	0.302851		A2		A2
NM_006566.1	CD226	65.6163	38.2065	92.5709	79.6957	0.759919	1.41079	328.07	174.183	105.182	67.5041	2.57979e-09	0.320608		A2		A2
NM_002990.1	CCL22	532.593	423.871	869.761	523.335	0.0386929	1.63307	1581.3	944.038	744.641	391.301	2.01955e-10	0.470905		A2		A2
NM_004245.1		66.7665	42.6157	72.0408	47.6465	0.507281	1.079	117.063	85.6725	53.622	17.8071	1.13787e-09	0.458061		A2		A2
NM_003671.1	CDC14B (includes EG:8555)	13.9448	14.3458	34.7929	26.2576	1.72567e-06	2.49504	24.4751	15.9115	8.28673	7.59347	0	0.338578		A2		A2
NM_000809.1	GABRA4	15.1195	13.9506	16.5925	8.02357	0.0340268	1.09742	29.9476	27.6505	13.5498	4.6872	1.23938e-08	0.45245		A2		A2
M16276.1	HLA-DQB1	128.195	140.215	450.775	488.036	1.16673e-11	3.51634	436.865	123.627	118.823	139.314	0	0.271991		A2		A2
BC001387.1	HRASLS3	53.1242	42.7838	63.0966	67.5045	0.00723719	1.18772	167.711	119.946	68.0789	64.2956	1.75504e-12	0.405929		A2		A2
BC001606.1	NCF2	258.408	50.3842	692.551	513.875	2.04373e-24	2.68007	678.207	849.6	223.333	94.9804	9.72191e-11	0.329299		A2		A2
AB022918.1	ST3GAL6	42.0579	49.4469	41.3763	21.0015	0.00628168	0.983794	161.265	102.178	58.616	80.9266	2.22045e-16	0.363476		A2		A2
U13699.1	CASP1	92.3477	80.1863	271.965	225.512	3.58285e-05	2.94501	232.97	202.709	97.6504	95.0634	1.08427e-08	0.419154		A2		A2
BF439983	CASP8	43.3153	13.2373	52.2508	23.4524	0.293098	1.20629	95.7352	58.9284	36.7377	10.7981	3.37463e-41	0.383743		A2		A2
AI768628	CLIC2	53.8053	42.0157	166.584	141.709	0.00071619	3.09605	202.384	69.6195	82.4115	79.1635	0	0.407203		A2		A2
NM_014600.1	EHD3	19.0602	20.7226	28.6487	35.016	2.21203e-07	1.50307	24.3815	14.9548	9.5478	7.47356	3.77476e-14	0.391599		A2		A2
NM_003740.1		7.22831	8.32175	23.7289	23.6493	0.00183299	3.28278	27.6888	5.71776	13.1697	11.9866	0	0.475633		A2		A2
NM_021614.1		12.4015	10.094	35.7253	71.8654	0.810864	2.88072	48.255	65.9104	6.41703	9.96434	0	0.132982		A2		A2
NM_016229.1	CYB5R2	74.9344	47.1624	70.9587	65.5341	0.332659	0.946945	116.711	37.7755	47.8222	27.2295	0	0.409747		A2		A2
NM_022136.1	SAMSN1	189.803	93.4106	163.929	39.6836	0.438998	0.863679	567.592	199.23	237.916	126.733	0	0.419168		A2		A2
NM_030882.1		15.2373	13.1591	27.7577	14.0047	0.00240491	1.8217	42.1461	18.8419	17.0275	8.32666	8.24053e-13	0.404011		A2		A2
NM_020639.1	RIPK4	8.35005	7.91264	46.4018	51.389	0.000213258	5.55706	43.8776	63.7977	5.27683	6.19001	2.61064e-15	0.120262		A2		A2
NM_000942.1	PPIB	3106.8	363	2923.65	650.343	0.10442	0.941049	975.818	171.623	1974.04	991.762	7.76477e-45	2.02295		A1		A1
NM_006435.1	IFITM2	1178.9	161.705	1216.31	610.361	0.385335	1.03174	839.606	277.89	1742.18	461.96	0	2.07499		A1		A1
NM_000714.2	BZRP	343.087	101.2	187.073	96.3906	1.23686e-10	0.545263	124.679	42.2297	309.771	51.8479	0	2.48455		A1		A1
NM_000595.2	LTA	560.232	48.1462	378.573	135.916	0	0.675743	250.913	80.4016	549.409	89.4562	0	2.18964		A1		A1
NM_003040.1	SLC4A2	39.6762	31.7801	41.1059	23.2873	0.71226	1.03603	11.6944	10.4575	25.1027	11.8307	0	2.14656		A1		A1
NM_003165.1	STXBP1	17.58	15.8314	8.76176	12.889	2.09459e-07	0.498393	5.05645	7.40554	25.0769	22.1386	0	4.95938		A1		A1
AL353950.1	PPP3CA	152.916	62.6979	131.882	51.8811	0.427403	0.862446	105.258	41.402	228.993	103.196	2.22538e-14	2.17554		A1		A1
NM_006010.1	ARMET	696.47	234.423	698.165	181.344	0.816344	1.00243	322.236	69.1747	659.879	285.706	3.45596e-33	2.04781		A1		A1
NM_002436.2	MPP1	65.809	25.5379	57.6788	22.7487	0.387931	0.876457	43.8141	26.9593	90.8408	23.2364	0	2.07332		A1		A1
NM_001548.1	IFIT1	130.125	91.1677	123.285	91.4834	0.659301	0.94743	59.6054	54.5938	159.516	121.728	2.84839e-12	2.67619		A1		A1
NM_002526.1	NT5E	26.1346	12.642	25.132	16.5548	0.652772	0.961635	10.3183	11.183	26.0696	12.8303	0	2.52653		A1		A1
NM_006877.1	GMPR	50.7077	45.2937	13.0761	9.37944	0.00877917	0.257873	11.364	10.0549	29.2156	16.7365	0	2.57088		A1		A1
M74921.1	EDNRB	27.7696	14.3551	5.69026	5.51974	0	0.20491	12.6878	6.06847	26.457	20.7272	2.70998e-05	2.08524		A1		A1
NM_006820.1		967.546	758.291	1015.23	805.339	0.997829	1.04928	971.014	746.101	2008.83	783.958	0	2.06879		A1		A1
NM_005263.1	GFI1	18.6775	15.6341	22.6322	21.5659	0.941505	1.21174	10.9624	9.51208	27.157	15.2758	0	2.47728		A1		A1
NM_000594.1	TNF	163.513	33.8241	191.238	73.3655	0.334787	1.16956	57.2508	13.706	122.786	44.3373	0	2.1447		A1		A1
NM_006800.1		625.342	316.227	639.091	350.608	0.980997	1.02199	272.696	147.343	560.571	292.786	1.69454e-08	2.05566		A1		A1
NM_005018.1	PDCD1	19.2119	14.7551	19.3136	13.1579	0.990745	1.0053	10.4135	8.34879	21.8687	10.3854	0	2.10003		A1		A1
NM_004968.1		57.2138	22.8825	50.8963	19.2347	0.550475	0.88958	28.887	12.5283	87.8783	111.324	7.82045e-05	3.04214		A1		A1
NM_002110.1	HCK	347.249	315.521	360.027	240.963	0.46888	1.0368	102.964	78.6216	499.03	460.72	5.4544e-08	4.84663		A1		A1
NM_004030.1	IRF7	725.318	223.182	577.731	191.817	0.0804803	0.79652	354.478	128.056	738.84	118.309	0	2.0843		A1		A1
AI082078	ACTN1	101.089	79.2589	98.2531	86.3859	0.903521	0.971947	41.8202	50.5515	128.947	111.029	0	3.08335		A1		A1
L07555.1	CD69	258.432	177.504	155.455	104.131	0.104492	0.601531	122.232	65.1975	253.194	130.982	7.1046e-07	2.07142		A1		A1
AF074979.1	RGS20	118.008	104.267	48.6151	44.8475	0.0314714	0.411964	48.2655	23.4409	119.305	85.6641	1.67279e-11	2.47186		A1		A1
U58515.1	CHI3L2	1183.95	955.869	1246.4	988.157	0.874103	1.05275	1010.37	998.895	2129.15	885.364	0	2.10731		A1		A1
NM_006417.1	IFI44	411.196	342.578	389.837	267.897	0.611759	0.948057	360.074	221.694	840.524	325.814	0	2.33431		A1		A1
AF161454.1	APOM	19.1549	9.1092	14.4599	9.44178	0.0362556	0.754895	11.0254	7.73209	22.6434	11.8454	2.68036e-05	2.05375		A1		A1
NM_013337.1	TIMM22	34.1513	24.1864	22.0798	11.4972	0.0889598	0.646528	18.6193	15.5136	37.8376	13.2276	0	2.03217		A1		A1
NM_016642.1		14.9052	8.90219	16.5065	10.7374	0.0521383	1.10743	10.7362	6.81773	22.0796	10.3257	1.71158e-06	2.05656		A1		A1
NM_016602.1	CCR10	168.934	43.4876	212.693	66.9672	0.0364884	1.25903	105.202	21.5323	217.46	82.258	0	2.06707		A1		A1
NM_030930.1		21.8199	13.6953	16.765	11.6008	0.257558	0.768337	13.8881	9.96944	28.6067	12.0728	1.63236e-09	2.0598		A1		A1
NM_006889.1	CD86	42.0662	21.644	273.07	91.8618	0	6.49143	103.83	95.4621	104.133	82.0072	0.690023	1.00292	A1		A1
NM_002305.2	LGALS1	2577.94	857.371	8257.85	1599.93	0	3.20327	5758.63	1912.08	5553.81	2507.47	0.523309	0.964432	A1		A1
NM_002166.1	ID2	183.927	50.3938	406.072	237.805	1.60986e-09	2.20778	715.511	900.183	567.905	552.184	0.619914	0.793705	A1		A1
NM_003897.1	IER3	260.323	48.0428	578.261	182.158	5.11608e-27	2.22132	195.48	82.819	228.579	123.054	0.378693	1.16932	A1		A1
NM_017458.1	MVP	158.645	47.8868	494.747	144.359	0	3.11858	235.897	141.103	269.427	77.0351	7.43411e-05	1.14214	A1		A1
NM_002053.1	GBP1	93.3801	26.1644	408.933	236.508	4.56086e-18	4.37924	95.5654	20.9832	109.556	59.5701	0.691826	1.14639	A1		A1
NM_000201.1	ICAM1	214.171	28.7603	491.347	91.8951	0	2.29418	230.93	81.6815	293.217	85.2642	6.06468e-06	1.26972	A1		A1
NM_004120.2	GBP2	140.11	25.0929	333.468	165.537	6.88975e-24	2.38004	179.407	80.7496	133.423	56.6236	0.00243889	0.743689	A1		A1
NM_007286.1	SYNPO	19.9374	8.28001	70.9523	18.11	0	3.55875	46.0527	21.1546	55.0437	54.6312	0.859872	1.19523	A1		A1
NM_000877.1	IL1R1	26.0279	24.3008	95.1513	63.5732	4.37428e-14	3.65574	101.66	139.142	60.9333	58.2475	0.261856	0.599382	A1		A1
NM_001450.1	FHL2	87.0149	33.9821	209.521	96.6085	2.54717e-07	2.40788	46.8142	43.6018	53.2744	36.4921	0.0420578	1.138	A1		A1
NM_005572.1	LMNA	322.015	108.892	806.594	276.132	1.94327e-10	2.50483	462.744	405.572	423.105	170.573	0.0553463	0.91434	A1		A1
AA740186	BLVRA	97.2709	10.2028	217.745	48.6878	0	2.23854	127.06	78.4687	120.84	34.9473	0.241568	0.951047	A1		A1
NM_001078.1	VCAM1	21.1779	11.5236	62.1991	24.4796	3.71925e-13	2.93698	22.1903	12.8849	18.1788	7.41117	0.00106351	0.819225	A1		A1
NM_003272.1	GPR137B	85.4882	20.035	313.228	117.909	0	3.66399	242.134	80.9504	231.051	94.1423	0.443069	0.954229	A1		A1
NM_004350.1	RUNX3	279.298	70.607	695.274	104.392	0	2.48936	480.686	134.19	492.309	160.525	0.929026	1.02418	A1		A1
BE895437	TK2	7.90707	6.95731	23.8237	6.37331	0	3.01296	13.5209	13.0983	13.4355	9.17664	0.0361111	0.993688	A1		A1
NM_002371.2	MAL	41.7822	7.81082	153.215	75.8852	6.57122e-58	3.66699	115.318	88.2075	114.372	116.307	0.367954	0.991796	A1		A1
NM_000170.1	GLDC	233.663	64.4455	507.058	222.895	3.00728e-08	2.17004	279.561	129.856	257.28	107.198	0.493735	0.920302	A1		A1
NM_001953.2	ECGF1	61.3804	18.5022	146.56	44.6972	1.6573e-12	2.38773	44.1387	14.8181	51.7552	22.5976	0.142767	1.17256	A1		A1
BC002363.1	RPS6KA2	40.3578	14.7448	87.3665	32.6218	7.10955e-06	2.1648	59.253	23.0186	68.0747	25.3347	0.175191	1.14888	A1		A1
NM_002628.1	PFN2	136.544	105.574	413.626	150.507	0	3.02926	272.271	165.481	268.376	276.309	0.14948	0.985696	A1		A1
AW293531	NMT2	17.6247	5.18999	53.4796	35.5607	6.25966e-10	3.03436	51.1438	29.7896	44.6988	34.0917	0.21111	0.873982	A1		A1
NM_000878.1	IL2RB	579.189	42.0272	1208.81	494.989	1.02812e-100	2.08708	684.55	208.273	870.543	326.525	0.00133124	1.2717	A1		A1
NM_003866.1	INPP4B	12.532	10.8966	55.8603	43.3946	3.92797e-13	4.4574	33.9772	35.413	18.8998	15.2233	0.103599	0.556249	A1		A1
NM_004633.1	IL1R2	23.2626	9.1008	174.994	94.693	2.30485e-34	7.52254	69.0787	54.4969	85.416	99.0575	0.621482	1.2365	A1		A1
NM_003391.1	WNT2	12.4894	7.41421	28.7085	11.772	1.14514e-10	2.29864	9.76907	6.47899	12.3505	6.53916	0.0133758	1.26424	A1		A1
NM_006902.2	PRRX1	11.1597	3.11304	25.314	11.6404	4.78158e-11	2.26834	98.3968	150.094	15.0549	6.68225	0.000201205	0.153002	A1		A1
NM_003536.1		10.6565	7.34944	21.7684	7.0245	1.51173e-08	2.04274	21.4354	13.514	23.0524	3.07544	0	1.07544	A1		A1
NM_000833.2	GRIN2A	16.4028	5.07778	38.6135	23.6608	1.85204e-08	2.35408	52.0876	65.1332	15.9798	6.33089	1.2804e-07	0.306787	A1		A1
NM_004717.1	DGKI	6.18175	5.58603	33.7116	14.3568	6.4837e-13	5.4534	27.6907	19.0454	20.969	17.7575	0.0134327	0.757258	A1		A1
NM_005191.1	CD80	228.158	36.0876	508.138	59.8023	0	2.22713	630.419	125.904	514.971	110.33	4.81322e-06	0.816871	A1		A1
NM_000724.1	CACNB2	12.1911	10.5644	34.7273	22.2718	6.76315e-06	2.84859	52.1705	36.1651	47.6971	42.7524	0.106624	0.914254	A1		A1
NM_000443.2	ABCB4	25.8203	9.78494	54.7869	26.1002	1.38785e-06	2.12185	50.0367	50.0436	33.0046	18.5967	0.318671	0.659608	A1		A1
NM_006599.1	NFAT5	18.3017	5.54702	45.2393	23.4649	5.49924e-11	2.47187	62.7049	17.5771	56.6205	16.1449	0.10859	0.902968	A1		A1
NM_001815.1	CEACAM3	9.71533	8.08702	29.7108	14.1569	1.4254e-10	3.05813	21.9057	7.86877	28.1202	11.9008	0.0218323	1.28369	A1		A1
NM_005290.1	GPR15	122.003	23.9064	391.899	241.846	1.29701e-35	3.21221	239.709	93.8755	283.95	175.198	0.548149	1.18456	A1		A1
L12387.1	SRI	1096.36	130.304	2276.83	582.678	4.97099e-44	2.07672	1084.09	617.781	1008.41	300.309	0.773207	0.930193	A1		A1
AF323540.1	apolipoprotein L-I	34.8208	24.2358	112.534	63.9207	7.65498e-09	3.23179	94.393	112.95	47.9003	26.4585	0.616493	0.507456	A1		A1
U51120.1	PAK1	48.675	23.9147	155.822	24.324	0	3.20127	83.8169	35.2589	87.9073	36.4072	0.349072	1.0488	A1		A1
AF065214.1	PLA2G4C	31.2841	10.5339	96.2612	29.9592	5.74081e-14	3.07701	72.6761	26.8611	85.5787	63.453	0.975881	1.17754	A1		A1
U61536.1	KCNMB1	37.4872	36.4761	213.429	173.513	1.71311e-08	5.69338	50.6434	12.3032	50.9623	47.11	9.23986e-07	1.0063	A1		A1
AF016535.1	MDR1	7.12594	7.56917	46.1919	24.6867	0	6.48222	37.4113	47.6459	24.2924	14.3396	3.09752e-12	0.649333	A1		A1
AB005043.1	SOCS1	61.5822	7.62104	134.006	45.6301	1.097e-44	2.17605	79.5576	59.9037	65.2823	29.8744	0.539513	0.820567	A1		A1
U82979.1	LILRB4	13.1749	7.4151	33.9582	11.3662	6.15064e-14	2.57749	37.1677	32.2157	24.5207	13.4521	0.0290914	0.659733	A1		A1
BC002351.1		6.381	6.81275	21.7233	7.35825	0	3.40438	13.2328	9.53408	11.6764	9.8684	0.287757	0.882386	A1		A1
AB035482.1		232.681	45.741	514.148	98.3682	0	2.20967	315.35	178.386	398.596	218.985	0.0124999	1.26398	A1		A1
AF041461.1	CFLAR	149.321	49.57	454.662	148.8	8.38441e-15	3.04486	309.303	57.0175	326.389	89.0049	0.481282	1.05524	A1		A1
BC002630.1	ITGB8	10.9888	7.10919	25.3106	5.72423	0	2.30331	21.7496	15.8881	15.748	8.88165	0.154333	0.72406	A1		A1
AL117381	BCL2L1	59.2195	20.4156	119.09	25.5957	0	2.01099	76.4523	31.6607	86.6613	40.1225	0.514799	1.13353	A1		A1
AU158495	NOTCH2	21.4526	9.67208	44.0222	17.8373	8.04201e-05	2.05207	50.5205	28.2586	28.7457	17.0209	0.000729138	0.568991	A1		A1
U73304		19.2517	7.49215	54.1967	15.8781	0	2.81517	65.4101	60.6642	38.942	36.9567	0.0054071	0.595352	A1		A1
NM_003526.1		8.53927	7.98039	31.28	8.68062	0	3.66308	12.2934	10.1239	14.0527	7.05974	1.57087e-07	1.14311	A1		A1
NM_014624.2	S100A6	69.5477	26.4112	213.534	150.91	6.14904e-08	3.07033	64.007	62.1301	52.1457	29.0566	0.773559	0.814687	A1		A1
BF031829	DSG2	103.959	33.0731	249.567	130.921	1.53028e-09	2.40064	194.965	101.239	116.12	109.992	0.000376984	0.595597	A1		A1
NM_005706.1		24.7085	15.0458	54.4948	18.5811	1.66778e-12	2.20551	29.972	11.9184	23.4771	11.5338	3.7656e-07	0.783301	A1		A1
NM_012339.1		7.2416	5.72502	29.6753	18.8558	7.06822e-09	4.09789	9.68794	10.2125	10.282	6.47204	5.68674e-09	1.06132	A1		A1
BG338251	RAB7L1	85.9754	24.4926	230.043	112.376	3.59772e-14	2.67568	107.07	85.6632	97.1373	48.6811	0.245507	0.907231	A1		A1
NM_004765.1		47.8551	27.8161	101.518	41.1341	5.45505e-08	2.12136	36.5792	16.0182	35.6738	31.1834	0.0402555	0.975247	A1		A1
NM_017414.1	USP18	66.8174	11.7143	225.04	87.6367	5.7258e-57	3.36799	106.329	54.879	122.412	40.8519	0.00324752	1.15126	A1		A1
NM_015930.1	TRPV2	213.149	43.2351	446.211	37.0427	0	2.09343	226.131	104.919	275.011	125.66	0.0177718	1.21616	A1		A1
NM_015711.1		12.4673	6.81549	25.4757	7.71245	6.16409e-11	2.0434	27.1363	16.0243	26.0844	11.7952	0.994466	0.961238	A1		A1
NM_022129.1		11.1542	7.1687	24.3167	4.11097	0	2.18004	10.3312	5.65064	12.5253	6.27736	0.33226	1.21238	A1		A1
NM_030769.1		17.3783	4.54994	40.0482	7.60182	0	2.3045	39.109	28.452	20.1642	7.77696	2.06968e-06	0.515589	A1		A1
NM_030766.1	BCL2L14	12.6404	11.6109	40.9375	7.61706	0	3.23862	25.9417	21.6594	17.176	11.5989	0.0047489	0.662102	A1		A1
U11058.2	KCNMA1	63.9576	44.6308	161.978	81.9053	1.13694e-09	2.53259	67.443	18.2269	55.7171	52.843	0	0.826136	A1		A1
NM_004251.1	RAB9A	602.333	179.815	1374.85	462.245	1.60321e-11	2.28255	865.628	182.628	729.388	210.361	0.000443305	0.842611	A1		A1
NM_021095.1		105.715	22.5668	228.483	93.1676	4.19111e-17	2.1613	208.919	112.273	127.843	47.2884	1.34713e-08	0.611925	A1		A1
U08839.1	PLAUR	25.9222	9.51466	59.6979	31.1379	1.39178e-05	2.30296	53.1532	27.2732	33.6446	20.4741	8.7766e-06	0.632974	A1		A1
NM_024430.1	PSTPIP2)	33.0908	14.3144	122.969	82.5871	1.53369e-09	3.7161	65.1475	27.1563	38.7144	17.7486	9.52448e-09	0.594257	A1		A1
NM_001958.1	EEF1A2	57.7603	46.2375	11.7157	9.33472	4.93304e-06	0.202833	12.3876	8.64373	39.0774	32.3729	0	3.15455	A2	A1
NM_007199.1	IRAK3	17.2761	10.3628	31.2843	25.9855	0.0982654	1.81084	33.8281	11.5526	23.484	17.7789	1.56211e-11	0.694218			A1
NM_002198.1	IRF1	182.657	73.5542	306.468	100.922	8.15391e-05	1.67783	144.867	57.1945	169.578	40.2623	0.000112109	1.17058			A1
NM_002647.1	PIK3C3	267.887	98.7528	409.461	76.574	1.45863e-09	1.52848	493.918	262.38	502.313	202.786	0.560532	1.017			A1
M24915.1	CD44	772.986	268.638	1283.32	307.518	1.39118e-06	1.66021	1079.41	419.846	1223.88	700.157	0.535433	1.13385			A1
U70451.1	MYD88	348.426	30.7028	573.538	140.771	3.53342e-38	1.64608	318.617	46.034	352.111	105.398	0.0596814	1.10512			A1
NM_021181.2	SLAMF7	213.128	80.6492	372.262	123.434	1.52447e-05	1.74666	722.5	422.5	776.317	123.523	0	1.07449			A1
NM_001838.1	CCR7	290.51	40.1579	1031.2	498.684	1.3012e-89	3.54962	1421.06	1082.91	513.909	147.048	2.41008e-36	0.361637	A1	A2
L35594.1	ENPP2	17.8046	18.132	71.5064	45.7488	2.22045e-16	4.01617	74.5463	71.9472	28.3458	19.265	1.22247e-06	0.380244	A1	A2
AA393940	EIF5A	69.0596	36.6527	663.435	379.898	1.78071e-32	9.60671	350.293	217.004	144.177	168.309	1.25879e-08	0.41159	A1	A2
NM_004102.2	FABP3	23.4683	6.74988	2.16421	1.00216	0	0.0922184	4.78175	4.82404	6.49387	4.33884	1.66238e-05	1.35805	A4
NM_022352.1	CARD9	28.7809	22.2455	2.47964	2.67564	1.69864e-13	0.0861559	10.1316	11.2088	9.88582	14.1735	0.694136	0.975746	A4
NM_012101.1	ATDC	2.4249	0.910996	84.8398	80.5707	2.28439e-57	34.9869	20.5296	14.5709	23.2552	13.6437	0.372867	1.13277	A3
AF069681.1	KHDRBS3	1.34087	0.991698	45.174	34.151	0	33.6901	19.7948	26.9076	2.47192	2.36534	1.91227e-09	0.124877	A3
NM_000690.1	ALDH2	275.226	40.7173	117.566	123.581	0	0.427161	168.804	36.7121	264.925	83.4335	1.02412e-17	1.56942	A2
AL513917	SLC16A3	223.153	38.7698	105.803	49.9187	0	0.474128	130.228	42.8481	204.824	84.8951	6.37506e-08	1.57281	A2
NM_005258.2	GCHFR	402.692	182.377	115.427	52.1033	3.7943e-12	0.28664	136.447	23.6123	192.209	56.5122	1.64554e-12	1.40867	A2
U45448.1	P2RX1	46.55	13.542	19.2231	12.6077	0	0.412956	16.9593	9.60401	32.2211	14.8147	4.93672e-06	1.89991	A2
AL523144		22.29	9.17576	11.1134	7.30486	5.83046e-06	0.498582	30.181	14.7392	42.0593	12.5433	1.37002e-13	1.39357	A2
AI445650	PRF1	51.601	19.3792	21.1263	16.5006	0	0.409417	16.7931	8.63932	27.326	10.3721	1.05634e-09	1.62722	A2
NM_013332.1	HIG2	821.429	103.317	339.181	175.189	0	0.412916	759.072	191.175	1032.2	197.815	0	1.35982	A2
NM_021991.1	JUP	71.0629	36.0569	28.7081	16.3077	4.37389e-05	0.403982	33.0107	38.6749	59.3426	56.8103	0.000244902	1.79768	A2
NM_002510.1	GPNMB	73.513	20.18	28.7329	5.77483	0	0.390855	43.0219	7.26755	37.2222	13.162	5.40376e-06	0.865191	A2
NM_002084.2	GPX3	24.9726	5.74508	10.4381	5.52332	0	0.417984	13.5438	5.3617	18.5198	3.72005	0	1.3674	A2
NM_001033.1	RRM1	967.868	218.698	483.015	156.293	3.28626e-14	0.49905	726.2	138.422	683.485	210.812	0.0667717	0.94118	A2
AA194254	PKP4	83.2408	14.4468	40.9963	27.6823	0	0.492503	44.9453	14.6466	49.6711	16.7977	0.219115	1.10515	A2
NM_006122.1	MAN2A2	128.209	53.823	59.5142	22.1425	2.5465e-08	0.464197	107.069	24.0641	100.175	20.5397	0.128195	0.935615	A2
NM_005962.1	MXI1	395.073	72.4429	159.078	88.5115	0	0.402655	652.739	346.383	768.908	232.427	5.10445e-09	1.17797	A2
NM_002957.2	RXRA	230.351	105.168	109.828	40.659	1.11053e-05	0.476784	109.004	40.2807	141.286	40.3379	1.17806e-05	1.29615	A2
NM_003798.1	CTNNAL1	436.392	46.6397	207.877	92.8987	0	0.476355	406.928	145.711	316.073	98.971	0.0012536	0.776729	A2
NM_000597.1	IGFBP2	44.2286	15.0903	4.69764	5.74275	0	0.106213	1.98114	2.56718	4.8588	4.4809	0.19683	2.45253	A2
NM_000137.1	FAH	230.595	121.112	87.595	32.1311	1.04623e-07	0.379865	110.606	29.8842	111.946	27.5094	0.68891	1.01212	A2
AL524035	CDC2	562.759	170.667	264.473	72.9185	8.14132e-11	0.469957	671.174	197.757	574.558	238.252	0.00305353	0.85605	A2
NM_014345.1	ZNF318	262.818	58.6045	87.8608	24.3314	0	0.334303	349.982	137.293	331.86	155.06	0.605121	0.948218	A2
NM_007150.1		55.9231	38.2842	11.5765	5.65379	2.56517e-09	0.207008	30.6651	11.0006	26.6071	8.66868	0.0503612	0.867667	A2
NM_001055.1	SULT1A1	117.157	47.5236	57.5333	13.4815	2.87985e-11	0.49108	77.1363	11.3624	84.3988	16.4401	0.021689	1.09415	A2
AI950380	BCL7A	33.1818	7.35881	14.5507	6.36228	0	0.438514	28.3161	11.8256	23.4991	19.2244	0	0.829885	A2
NM_001859.1		232.2	67.8213	100.948	31.0815	4.84413e-12	0.434744	115.905	47.1731	110.206	32.4017	0.848072	0.950834	A2
BE966146	RAD51AP1	136.021	40.6134	65.5331	27.0137	3.56913e-09	0.481788	138.873	53.2079	128.514	42.5579	0.35621	0.925408	A2
NM_002413.1	MGST2	149.9	59.6337	65.6266	49.1249	6.5794e-12	0.437802	73.2847	52.7983	71.1037	53.4995	0.976776	0.97024	A2
NM_005261.1	GEM	102.804	17.4758	40.1392	37.982	0	0.390444	122.865	49.4324	98.7707	39.8806	0.0392036	0.803895	A2
NM_006202.1	PDE4A	74.5798	15.122	28.4571	12.6673	0	0.381566	59.7159	30.2034	61.9869	34.4572	0.874638	1.03803	A2
NM_014381.1	MLH3	46.1661	15.9906	21.9674	8.32066	4.08015e-07	0.475835	49.2607	12.7969	42.9564	7.77593	0.00196968	0.872022	A2
NM_002412.1	MGMT	184.171	24.1814	36.5745	38.6211	0	0.19859	127.433	25.8385	149.186	51.8756	0.012485	1.1707	A2
NM_005356.1	LCK	932.952	308.552	172.555	197.419	0	0.184956	416.186	148.762	554.518	316.032	0.24168	1.33238	A2
NM_000946.1	PRIM1	431.527	47.1596	215.289	56.6637	0	0.498901	309.436	59.4583	276.07	59.2631	0.0096803	0.892173	A2
NM_001415.1	EIF2S3	1166.71	345.047	482.844	103.868	7.59856e-20	0.41385	596.174	535.121	702.302	652.746	0.938934	1.17802	A2
NM_002068.1	GNA15	248.361	76.1041	91.0326	67.0602	0	0.366534	159.375	102.32	173.633	68.6763	0.0399873	1.08946	A2
NM_002637.1	PHKA1	21.5109	14.5258	5.33783	3.79825	2.62687e-05	0.248145	22.6079	17.2271	20.9971	17.9323	0.879911	0.928751	A2
NM_014450.1	SIT1	570.367	144.252	203.122	68.2104	0	0.356125	351.939	102.329	425.691	126.315	0.000508752	1.20956	A2
NM_002131.1	HMGA1	641.285	134.749	288.42	38.398	0	0.449753	444.691	130.79	541.158	153.741	0.00123773	1.21693	A2
NM_004721.1	MAP3K13	44.2513	9.73394	16.6947	12.2744	0	0.377271	40.036	15.5342	47.8552	12.931	0.000142042	1.1953	A2
NM_001321.1	CSRP2	51.1795	11.3012	12.2912	4.44228	0	0.240159	19.4724	9.0357	26.5995	15.1624	0.597777	1.36601	A2
NM_000050.1	ASS	135.012	64.0978	58.9964	53.2463	0.00014541	0.436972	71.347	25.7714	112.293	99.254	0.0820146	1.5739	A2
NM_006143.1		51.0313	12.8596	15.7507	7.11369	0	0.308649	32.2208	16.8228	25.3969	10.5067	0.0949754	0.788216	A2
NM_006885.1	ATBF1	20.1325	6.58281	9.68063	8.84057	2.66454e-14	0.480846	7.57901	4.90975	11.2919	8.29383	0.0370714	1.48989	A2
NM_021926.1	ALX4	24.332	8.65037	10.4846	7.66162	2.37588e-14	0.430898	10.978	9.12829	19.8093	9.32103	0	1.80445	A2
BC002515.1	ALDH7A1	114.574	24.5793	22.4553	13.526	0	0.195989	58.2732	38.7195	57.159	32.1851	4.35445e-05	0.98088	A2
AF027706.1	RIPK2	21.3233	7.98497	8.70636	5.66943	1.63425e-12	0.408303	15.7515	12.3552	14.2793	5.06459	5.91877e-06	0.906532	A2
BC003070.1	GATA3	96.2375	45.4157	31.1644	19.8137	5.76813e-10	0.323827	78.9496	54.7974	85.2586	54.7271	0.600683	1.07991	A2
BC002796.1	LYL1	105.433	29.1827	35.0207	11.8283	0	0.33216	57.7402	21.3613	59.0329	35.5926	0.00346215	1.02239	A2
U69563	RND1	26.8776	8.92279	12.894	8.6942	9.10552e-09	0.479729	15.8411	6.37133	13.5343	8.75094	0.108743	0.854377	A2
AF169148.1	CABP1	38.0163	25.5767	3.38057	3.59256	0	0.0889243	10.2042	7.76462	15.9593	20.376	0.175775	1.564	A2
AF034759.1	MSH5	139.272	21.3546	60.4111	23.1113	0	0.433762	122.956	19.6676	107.616	37.4923	2.93235e-06	0.875236	A2
AF222711.1	CTBP2	192.603	144.692	14.8451	10.4368	0	0.0770759	94.2268	85.0993	77.7798	59.4842	0.705372	0.825452	A2
AF031138.1	NCR3	38.7009	12.8066	10.3931	7.86869	0	0.26855	10.6138	14.5756	19.2841	11.8793	2.22045e-16	1.81688	A2
AF038602.1	PSTPIP1	55.6788	20.6805	26.7088	14.1237	1.94759e-09	0.479695	26.8666	13.177	45.7635	32.9705	0.0019185	1.70336	A2
BE617588	HPCAL1	192.865	53.7667	72.8629	25.3361	0	0.377793	93.0934	16.1352	126.782	60.7894	1.17191e-06	1.36188	A2
AF283777.2	CD72	36.1824	3.69693	9.80643	9.27461	0	0.271028	25.1379	20.1304	40.5324	26.5887	2.92523e-08	1.6124	A2
NM_016639.1	TNFRSF12A	27.7883	11.3784	10.7027	5.69701	4.30739e-09	0.38515	11.29	7.29341	11.5402	10.9377	0.665003	1.02216	A2
NM_015987.1	HEBP1	37.4076	29.5578	5.89499	6.21193	6.57904e-07	0.157588	19.1062	12.9844	18.7956	14.2145	7.45807e-05	0.983744	A2
NM_016301.1		321.913	81.1546	154.473	39.1974	1.24853e-11	0.479859	275.353	50.5875	233.085	71.7457	6.10623e-06	0.846495	A2
NM_005132.1	REC8L1	222.392	45.9304	91.4015	31.6963	0	0.410993	187.751	74.0761	151.245	107.488	0.000270506	0.805562	A2
NM_014322.1	OPN3	198.617	37.368	82.0066	23.89	0	0.412888	114.8	43.318	131.887	51.6245	0.392521	1.14883	A2
NM_014427.2		80.7598	24.3621	38.4325	17.47	5.01599e-13	0.475887	71.6613	10.8768	56.8259	20.2826	3.9968e-14	0.792979	A2
NM_020661.1	AICDA	587.577	130.484	143.896	73.4648	0	0.244897	575.654	291.405	552.969	205.598	0.83658	0.960593	A2
NM_019114.1		31.9972	19.6566	10.9663	7.02337	2.17648e-06	0.342728	22.3561	13.8407	20.6028	7.09209	0.00129076	0.92157	A2
NM_018660.1		153.311	48.0842	70.425	20.0077	2.98871e-08	0.459362	164.064	21.1361	207.052	42.4237	3.31933e-12	1.26202	A2
U10485	LRMP	812.3	288.723	390.405	251.491	3.78546e-07	0.480617	1060.86	174.96	856.149	234.235	7.623e-10	0.807033	A2
AB014609	MRC2	74.9436	16.2894	26.7238	13.4654	0	0.356586	67.5464	36.5737	70.9479	44.2014	0.804607	1.05036	A2
X82240	TCL1A	861.775	363.224	279.695	315.716	0	0.324557	278.755	171.522	545.103	351.799	0.00799679	1.95549	A2
D31840	ATN1	22.6629	10.6206	8.86564	6.1802	8.90853e-05	0.391196	32.3232	15.5509	26.1391	16.3164	0.0549581	0.80868	A2
SD= standard deviation
A1 = significant overexpression in patient samples versus control samples; A2 = significant overexpression in control samples versus patient samples; A3= gene expressed in patient samples only; A4= expressed in control samples only
Red text= the same for all other groups together
